# 1            **Ultraviolet Dosage and Decontamination Efficacy was** 2            **Widely Variable Across 14 UV Devices after Testing a Dried** 3            **Enveloped Ribonucleic Acid Virus Surrogate for SARS-** 4            **CoV-2**

5                            **Running title:** UV Decontamination, Enveloped Virus

6            **Tony L. Buhr<sup>1</sup>, Erica Borgers-Klonkowski<sup>1</sup>, Bradford W. Gutting<sup>1</sup>, Emlyn E. Hammer<sup>1</sup>,**  
7            **Shelia M. Hamilton<sup>1</sup>, Brett M. Huhman<sup>2</sup>, Stuart L. Jackson<sup>2</sup>, Neil L. Kennihan<sup>1</sup>, Samuel D.**  
8            **Lilly<sup>1</sup>, John D. Little, Jr<sup>2</sup>, Brooke B. Luck<sup>1</sup>, Emily A. Matuczinski<sup>1</sup>, Charles T. Miller<sup>1</sup>,**  
9            **Rachel E. Sides<sup>1</sup>, Vanessa L. Yates<sup>1</sup>, Alice A. Young<sup>1</sup>**

10  
11            <sup>1</sup>Naval Surface Warfare Center-Dahlgren Division, Concepts and Experimentation Branch  
12            (B64), Dahlgren, VA USA

13            <sup>2</sup>Naval Research Laboratory (Plasma Physics Division), Washington, DC USA

## 14            **Correspondence:**

15            Tony L. Buhr, PhD

16            [tony.l.buhr.civ@us.navy.mil](mailto:tony.l.buhr.civ@us.navy.mil)

17            **Keywords:**  $\Phi$ 6, enveloped virus, decontamination, ultraviolet (UV), SARS-CoV-2,  
18            COVID19

## 21            **Abstract**

22            **Aims:** The dosages and efficacy of 14 ultraviolet (UV) decontamination technologies were  
23            measured against a SARS-CoV-2 surrogate virus that was dried on to different materials for lab  
24            and field testing.

25            **Methods and Results:** A live enveloped, ribonucleic acid virus surrogate for SARS-CoV-2 was  
26            dried on stainless steel 304 (SS304), Navy Top Coat-painted SS304 (NTC), cardboard,  
27            polyurethane, polymethyl methacrylate (PMMA), and acrylonitrile butadiene styrene (ABS) at >  
28            8.0 log<sub>10</sub> plaque-forming units (PFU) per test coupon. The coupons were then exposed to UV  
29            light during both lab and field testing. Commercial and prototype UV-emitting devices were  
30            measured for efficacy; 4 handheld devices, 3 room/surface-disinfecting machines, 5 air-  
31            disinfection devices, and 2 larger custom-made machines. UV device dosages ranged from 0.01-  
32            729 mJ cm<sup>-2</sup>. Anti-viral efficacy among the different UV devices ranged from no  
33            decontamination up to nearly achieving sterilization. Importantly, cardboard required far more  
34            dosage than SS304.

35  
36 **Conclusions:** Enormous variability in dosage and efficacy was measured among the different  
37 UV devices. Porous materials limit the utility of UV decontamination.

38  
39 **Significance and Impact of the Study:** UV devices have wide variability in dosages, efficacy,  
40 hazards, and UV output over time indicating that each UV device needs independent technical  
41 measurement and assessment for product development, and prior to use.

42  
43

## 44 INTRODUCTION

45 UV light, particularly UV-C, is a known microbe disinfectant for air, water and  
46 nonporous surfaces (Anonymous 2021a, Anonymous 2021b). UV-C radiation can only inactivate  
47 microbes including viruses if they are directly exposed to the UV light. Therefore inactivation is  
48 far less effective if a microbe is associated with soil, dust, oils, any type of host cell debris, or if  
49 it is embedded in porous materials (Anonymous 2021a). This is particularly relevant for obligate  
50 pathogens like viruses which are naturally associated with host cell components and body fluids;  
51 mucus in the case of respiratory virus like SARS-CoV-2 (Stadnytskyi et al. 2020). The  
52 effectiveness of UV-C lamps in inactivating environmentally relevant SARS-CoV-2 virus is  
53 unknown because there is limited consistent and/or reliable published data about the wavelength,  
54 dose, and duration of UV-C radiation required to inactivate the SARS-CoV-2 virus (Anonymous  
55 2021a; Anonymous 2021b). This is true of all viruses because UV efficacy is further complicated  
56 by the fact that test methods for virus preparation and testing, particularly enveloped viruses, are  
57 highly variable among laboratories. Purified enveloped viruses are often tested in laboratories,  
58 even though these viruses only exist naturally when associated with host cell components and  
59 debris in nature, and they can be compromised during purification. For example, hemagglutinin  
60 stabilizes influenza A (Russell 2021) and mucus stabilizes SARS-CoV-2 (Stadnytskyi et al.  
61 2020), but both are typically absent from laboratory virus preparations. These stabilizing  
62 components can be added to virus, but often are not added, and there are other host cell  
63 components that may act as stabilizers as well. Furthermore, based on published measurements,  
64 SARS-CoV-2 respiratory droplets are typically 0-1 virions per speech particle, 99.9875-  
65 99.9998% mucus, less than 0.013% virus, and the water in SARS-CoV-2 respiratory particles  
66 evaporates within seconds to generate dry particles in the respirable size range (Stadnytskyi et al.  
67 2020). Enveloped virus is more stable at dry conditions compared to wet environments (Chan et  
68 al. 2011; Buhr et al. 2020; Hadi et al. 2020), and drying viruses via lyophilization is frequently  
69 used to stabilize virus for long-term storage (Greiff et al. 1954; Greiff and Richtel 1966;  
70 Malenovska 2014). Hence tests on wet virus vice dry virus will also greatly impact  
71 decontamination kinetics. Rhinotillexis (nose-picking) creates additional environmental loads of  
72 infectious virus, which is also composed of mucus mixed with unpurified virus, and varying  
73 levels of free water (Hendley et al. 1973; Weber et al. 2008).

74 In addition to methods gaps to define, characterize and standardize SARS-CoV-2 virus  
75 debris composition and drying, standardized methods for reproducibly preparing large titers of  
76 SARS-CoV-2 for testing without artificial post-harvest cleaning and concentration steps are  
77 needed. Furthermore, there were/are urgent needs during the COVID-19 pandemic to test  
78 decontamination devices, like UV, in field tests (any test outside of biosafety containment).

79 Viruses that fall under higher World Health Organization (WHO) biosafety level (BSL)  
80 classifications such as SARS-CoV-2 (BSL-3) and its BSL-2 surrogate coronaviruses  
81 (Anonymous 2020) cannot be widely used in field tests because of cost, time, and safety  
82 constraints. For field testing, the enveloped virus surrogate  $\Phi 6$  (Bibby et al. 2015; Gallandat and  
83 Lantagne 2017; Fedorenko et al. 2020) was previously used to make live/dead  $\Phi 6$  test indicators  
84 to directly test and compare decontamination efficacy across lab and field tests (Buhr et al.  
85 2020).

86 *Pseudomonas* virus  $\Phi 6$  is a BSL-1 enveloped RNA virus originally isolated in a bean  
87 field as a lytic virus that infects the plant pathogenic bacterium *Pseudomonas syringae* pathovar  
88 *phaseolicola* (Vidaver et al. 1973; Van Etten et al. 1976; Mindich 2004). The  $\Phi 6$  envelope  
89 structure is similar to many other enveloped viruses as the envelope consists of a  
90 glycoprotein/protein-embedded lipid membrane and the host cell has similar temperature  
91 sensitivity to mammalian cells at around 40°C. This is important since the envelope components  
92 are considered a target for inactivation by many different decontaminants including UV light,  
93 particularly at 222 nm (McDonnell and Burke 2011; Wiggington et al. 2012; Hadi et al. 2020;  
94 Anonymous 2021a).  $\Phi 6$  is a 13.5 kb double-stranded (ds)RNA phage (Mindich 2004), and  
95 spherical (80-100 nm diameter) with structural similarity to coronaviruses (50-200 nm diameter).  
96 The 13.5 kb dsRNA genome, the equivalent of 27 kb of single stranded RNA (ssRNA), is  
97 comparable to the 26-32 kb of ssRNA in coronaviruses. In theory, a surrogate virus should have  
98 a similar number of adjacent pyrimidines compared to SARS-CoV-2 since pyrimidine  
99 dimerization is considered an important mechanism of UV inactivation (e.g. Heßling et al. 2020).  
100 Based on pyrimidine target numbers only,  $\Phi 6$  (6,613 adjacent pyrimidine pairs) and SARS-CoV-  
101 2 (7,600 pairs) should have similar UV sensitivity, although ssRNA may be slightly more  
102 sensitive than dsRNA due to the potential for repair of dsRNA by the undamaged strand (Tseng  
103 and Li 2005). Hence sequence data alone theoretically implies that  $\Phi 6$  inactivation goals should  
104 be similar to or slightly more conservative than SARS-CoV-2. Separately, it is currently difficult  
105 to compare UV efficacy both within and across different viruses based on existing data because  
106 experimental tests are highly variable across different labs and studies (Hadi et al. 2020).  
107 Overall, the sequence comparison between the two viruses is likely moot because debris, drying,  
108 and porosity of contaminated surfaces have dominant impacts on decontamination kinetics  
109 (Anonymous 2021a, Anonymous 2021b), and practical confidence that test methods approach  
110 the challenge of field conditions is needed from field testing in order to increase confidence in  
111 devices to be employed by end users.

112 The subject of decontamination using UV light has attracted tremendous attention during  
113 the COVID-19 pandemic (reviewed in Raiszadeh and Adeli 2020), and numerous products  
114 incorporating UV light sources are available on the market to decontaminate air, water and  
115 surface materials. Variability in UV devices is extensive and includes differences in electronics,  
116 bulbs, power, and product designs. Devices that incorporate UV lights include handheld devices,  
117 room decontamination devices and HVAC systems. The distance from light sources at which  
118 decontamination/inactivation occurs is also widely variable ranging from a couple of centimeters  
119 to a couple of meters. UV light sources also differ and include mercury (Hg), Krypton Chloride  
120 (KrCl), Xenon (Xe) and various light emitting diodes (LED), which range in wavelength, and  
121 there are several different manufacturers. Additionally, although Hg bulbs are the most common,  
122 Hg bulb dosage significantly varies over time after the Hg bulb is turned on, and Hg comes with  
123 the risk of toxicity. The variability in these decontamination devices is further complicated by

124 variability in test methods which include different virus preparation methods, tests with  
125 unpurified vs. purified virus, tests with wet virus or dried virus, presence of organic debris, and  
126 differences in porosity of surface materials. Assessments of UV for decontamination must also  
127 take into account maintenance since UV lights need to be cleaned in order to maintain dosage  
128 (Anonymous 2021a, Anonymous 2021b).

129 Here  $\Phi 6$  was prepared at  $>10 \log_{10}$  PFU ml<sup>-1</sup> without post-harvest processing or  
130 concentration steps, and then dried on to different materials for  $>24$  hours (h) to make BSL-1  
131 live/dead enveloped virus test indicators at  $\geq 8.0 \log_{10}$  PFU coupon<sup>-1</sup>. Numerous UV devices  
132 were tested in both lab and field trials for both screening and iterative UV product improvement.

133

## 134 MATERIALS AND METHODS

### 135 $\Phi 6$ and Host Cell Preparations

136 Virus and host cell preparation was previously described (Buhr et al. 2020).  $\Phi 6$  and its host  
137 organism *P. syringae* pathovar *phaseolicola* HB10Y (HB10Y), causal agent of halo blight of the  
138 common bean, *Phaseolus vulgaris*, were isolated in Spain. Both were a kind gift from Dr.  
139 Leonard Mindich at Rutgers University, New Jersey Medical School. HB10Y was prepared by  
140 inoculating 100-200 ml of 3% tryptic soy broth (TSB; Fluka PN#T8907-1KG) in a 1-liter (l)  
141 smooth-bottom Erlenmeyer flask with a high efficiency particulate air filter cap. Cultures were  
142 incubated at  $26 \pm 2^\circ\text{C}$ , 200 revolutions (rev) minute (min)<sup>-1</sup> for  $20 \pm 2$  h. 11.1 ml of 100% glycerol  
143 (Sigma PN #G7757-500ML) was added per 100 ml of host culture. Final concentration of  
144 glycerol was 10%. One-ml aliquots of HB10Y were pipetted into screw-cap microfuge tubes  
145 with O-rings, and stored at  $-80^\circ\text{C}$ . HB10Y samples were titered prior to freezing by serially  
146 diluting samples in 10 millimolar (mM) of 4-(2-hydroxyethyl)-1-piperazineethanesulfonic acid  
147 (HEPES, Sigma PN#H4034-100G) + 10% Sucrose (Sigma PN #S7903-250G), pH 7.0, and  
148 plating on tryptic soy agar (TSA; Hardy Diagnostics, Santa Maria, CA). Plates were inverted and  
149 incubated at  $26 \pm 2^\circ\text{C}$  for  $48 \pm 2$  h to show titers of  $\sim 10^9$  cells ml<sup>-1</sup>. After freezing, tubes were  
150 thawed at room temperature (RT,  $22 \pm 3^\circ\text{C}$ ), serially diluted and plated to show sustained viability  
151 after long-term storage at  $-80^\circ\text{C}$ .

152  $\Phi 6$  was prepared after inoculating broth cultures of HB10Y. A frozen stock prep of HB10Y  
153 was thawed at  $22 \pm 3^\circ\text{C}$ . HB10Y was added either directly from a frozen stock or by transferring a  
154 single colony from a streaked TSA plate to 200 ml of 3% TSB in a 1-l smooth-bottom  
155 Erlenmeyer flask with a HEPA cap and incubated at  $26 \pm 2^\circ\text{C}$ , 200 rev min<sup>-1</sup> overnight. Cells were  
156 then diluted and grown to mid-log-phase. The host flask was inoculated with 0.5-1 ml of  $\Phi 6$  at a  
157 stock concentration of  $\sim 11$ - $12 \log_{10}$  PFU ml<sup>-1</sup>. The culture was incubated at  $26 \pm 2^\circ\text{C}$ , 200 rev  
158 min<sup>-1</sup> for  $24 \pm 2$  h. The  $\Phi 6$  preparation was stored at  $4^\circ\text{C}$  until after titering was completed. After  
159 titer determination was completed, typically around  $11$ - $12 \log_{10}$  PFU ml<sup>-1</sup>, then 1-1.3 ml volumes  
160 were aliquoted into 1.5-ml screw-cap tubes with O-rings, inverted and stored at  $-80^\circ\text{C}$ .

### 161 Coupon Materials and Sterilization

162 2 centimeter (cm) x 2 cm coupons of different test materials were inoculated with  $\geq 8.0$   
163  $\log_{10}$  PFU  $\Phi 6$  virus inoculum (Buhr et al. 2020). Materials for inoculation included stainless  
164 steel 304 (SS304), SS304 coupons painted with Navy Top Coat (NTC) (Coatings Group at the  
165 University of Dayton Research Institute (Dayton, OH, USA), acrylonitrile butadiene styrene  
166 (ABS) plastic, polymethyl methacrylate (PMMA) plastic (keyboard keys from Hewlett-Packard  
167 computer keyboards, later replaced with ABS), polyurethane plastic and cardboard. Plastic and  
168 SS304 represent non-porous materials. NTC represent semi-porous surfaces found on military  
169 ships. Cardboard represents porous materials used in shipping although it is not considered as  
170 porous as fabrics or carpeting.

171  
172 For sterilization, SS304 and NTC coupons were rinsed with 18 mega-Ohm-cm, de-  
173 ionized water, placed on absorbent paper in an autoclave-safe container and autoclaved for 30  
174 min at 121°C, 100 kilopascals. Keyboard keys were removed, trimmed, cleaned with soap, then  
175 rinsed with de-ionized water and wrapped in aluminum foil. ABS coupons were similarly rinsed  
176 with de-ionized water and wrapped in foil. Cardboard coupons were devoid of noticeable debris,  
177 flaws, and ink, and were wrapped in foil. After wrapping in foil, the keyboard keys, ABS, and  
178 cardboard were all sterilized via hot, humid air at 95°C and 90% relative humidity (RH) for 4 h.  
179 Polyurethane coupons, having been pre-cut, were soaked in ethanol to remove ink residue left  
180 over from the cutting process. They were then rinsed with de-ionized water, sterilized via  
181 immersion in 70% ethanol for greater than 20 min, and allowed to dry. All sterilized coupons  
182 were stored in sterile containers until used.

183

## 184 **Coupon Inoculation and General Test Design**

185

186 Five independent preparations of  $\Phi 6$  were removed from -80°C storage and thawed at  
187 22±3°C. Working inoculum was prepared by transferring stock  $\Phi 6$  into 50-ml conical tubes  
188 containing 10mM HEPES + 10% Sucrose pH 7.0 with a final concentration of  $\sim 9 \log_{10}$  PFU ml<sup>-1</sup>.  
189 Coupons were inoculated with 0.1 ml of  $\Phi 6$  working inoculum, and subsequently held at 22±3°C  
190 for greater than 24 h to dry and adhere to the material. The keyboard keys were slightly slanted.  
191 Therefore, during inoculation and drying, the keys were positioned in a sterilized surface which  
192 was elevated on an incline via slats to provide a level inoculation surface.

193 Once the inoculum had dried onto the coupons, they were exposed to UV light from the  
194 candidate devices as described in the below sections. Specific parameters for testing the  
195 individual devices varied but coupon number and preparation prior to testing was maintained  
196 across all experiments. For each test, five individual coupons were included for each of the test  
197 materials (SS304, cardboard, NTC, polyurethane, and either keyboard keys or ABS plastic), each  
198 inoculated with one of five independent virus preparations as described above. Extraction and  
199 shipping control coupons (inoculated and transported, when necessary, to the testing sites but not  
200 exposed to UV light) as well as negative control coupons not inoculated with virus were also  
201 included for every experiment. Finally, the  $\Phi 6$  virus inoculum used to prepare the coupons was  
202 maintained at RT from the date of coupon inoculation through the test and viral titer was  
203 measured at the conclusion of test exposures for each experiment. After UV exposure during  
204 testing, surviving virus was extracted and quantified as described below.

## 205 **Spectroscopic Analysis Hardware and Calibration**

206

207 The primary spectrometer used for this work is the Ocean Optics Maya 2000 Pro, which is  
208 capable of measuring optical spectra from 180 – 630 nm with an average bin size of 0.22 nm  
209 across the measurable spectrum. The distribution is not strictly linear, but can be specifically  
210 determined as necessary for data processing. The spectrometer was used with a fiber bundle  
211 (BFL200HS02), which incorporates seven  $\Phi 200\text{-}\mu\text{m}$  core fibers into a single high-OH package.  
212 This enables the measurement of sources with low output so the spectrometer can both retain a  
213 high signal-to-noise ratio and enable the use of a cosine corrector (CCSA2) for most  
214 measurements.

215 The Maya 2000 Pro spectrometer was calibrated using a Cathodeon R48 Deuterium Lamp,  
216 serial number CH5627. The spectral irradiance from this lamp is in units of  $\text{mW}\cdot\text{m}^{-2}\cdot\text{nm}^{-1}$  in 5  
217 nm intervals from 200 – 400 nm. To perform the calibration, the lamp is mounted vertically and  
218 positioned so that a horizontal line through the center of the area to be irradiated passes through  
219 the center of the lamp emission area, as well as perpendicular to the lamp window. The  
220 calibration refers to the spectral irradiance over an approximately  $10\text{ mm}^2$  area in a vertical plane  
221 located at a distance of 200 mm from the outside surface of the output window on the lamp. The  
222 lamp is operated from a 300-mA power supply, and must be operated continuously for 30 min  
223 prior to recording data on the spectrometer.

224 The spectrometer was mounted on an optical table, with a three-axis linear translation  
225 stage (Thorlabs LTS300) used to enable precision alignment between the spectrometer fiber  
226 sensor head and the source of interest. The three-axis system is capable of measuring a 300 mm x  
227 300 mm x 300 mm volume with computer automation using a process-controlled script via the  
228 Thorlabs Kinesis software. The data acquisition software used National Instruments LabVIEW  
229 for all aspects except direct control of the translation stages. All of the data was written to a  
230 single Technical Data Management Streaming data file for post-processing, which enabled all of  
231 the measurements to have a common time base for analysis. Post-processing was accomplished  
232 with the Jupyter software environment, with discrete Python code blocks to allow for processing  
233 of specific sources as needed. The raw TDMS data file is loaded into a cache file on the  
234 processing server, and a series of factors and calibrations are applied to prepare the raw data for  
235 analysis. Static measurements are relatively simple, as the position is fixed and no further  
236 analysis is required. Sweeps in a two-dimensional space with the translation stages requires  
237 synchronization of the position with digital fiducial markers to construct an image of the  
238 measured plane at a given distance from the source.

## 239 **Ultraviolet Devices and Testing**

240 A focus of this work was to provide information for screening field devices and to  
241 provide feedback for iterative product improvement. Specific data for prototypes were  
242 deliberately omitted since all prototypes were in the process of iterative improvement.

### 243 Commercial handheld devices (18-watt, 35-watt)

244 Two commercial handheld devices were acquired and tested, each within a custom test  
245 apparatus. The first was the GermAwayUV 18W Handheld UV-C Surface Sanitizer (SKU  
246 202110, bulb SKU 195317, CureUV, Delray Beach, FL, USA), a 120V/60Hz device containing  
247 two 12.7-cm long, U-shaped (Hg) UV bulbs emitting 254 nm UV-C light (**Figure 1A**). An  
248 average intensity of  $7.61\text{ mW cm}^{-2}$  was measured within a decontamination footprint of  $4.47\text{ cm}$

249 x 5.39 cm at a 5-cm standoff distance from the bulb (heat map of UV coverage is shown in  
250 **Figure 1C**). The second device was the GermAwayUV Premier 35W Handheld UV-C Surface  
251 Sanitizer (PN14-110-800-100, EPA Product No. 94850-DV-6, CureUV, Delray Beach, FL,  
252 USA), 120V/60Hz handheld containing two Hg bulbs that emit 254 nm UV-C light, with  
253 reflective material positioned within the unit to enhance UV coverage (**Figure 1B**). The twin  
254 tube bulbs spanned a length of 22.5 cm. The 35W device provided an average intensity of 6.95  
255  $\text{mW cm}^{-2}$  at 5-cm standoff distance from the bulb (**Figure 1D**). The 35W handheld was later  
256 discovered to contain ineffective ballasts (P/N 14-110-800-100), which negatively impacted  
257 results.

258 For testing the two handheld devices, wooden holding chambers were constructed in  
259 which the devices could be placed to provide standardized exposures to test materials. They were  
260 designed to hold the UV source 5 cm above the surface of a test coupon, to prevent UV  
261 reflection, and to allow coupons to be inserted into the apparatus via a sliding tray for a specified  
262 time period of virus inactivation and then promptly removed (**Figure 1A and 1B**). The design of  
263 the chambers was the same for the two devices, and only varied in size to accommodate the  
264 different dimensions of each device. Because Hg bulbs require a warm-up time to generate  
265 consistent dosage, the devices were powered on 30 min prior to testing to warm up and remained  
266 powered on for the duration of the test. To prevent potential contamination, the test chambers  
267 and devices were wiped down with pH6.8-adjusted bleach prior to being positioned inside a  
268 biosafety cabinet (BSC) for testing.

269

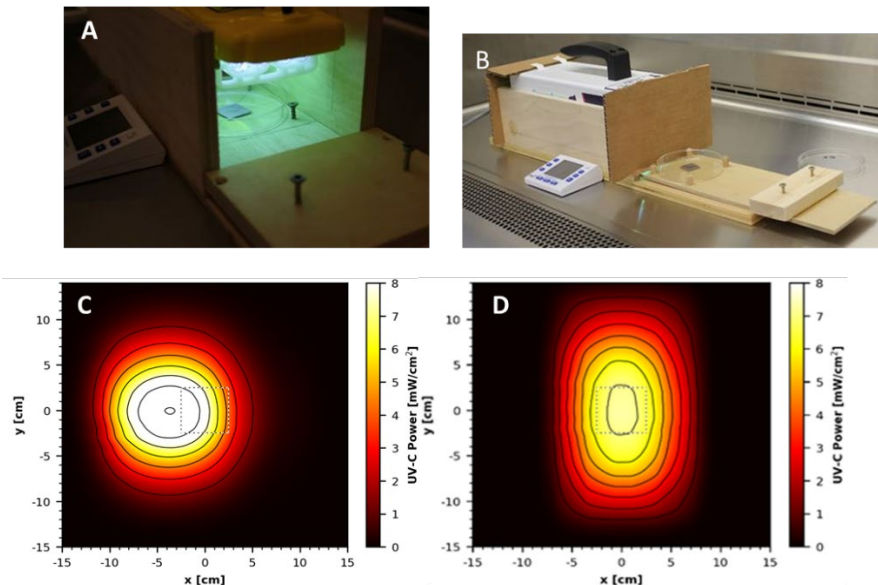

271 **Figure 1.** Testing setup and UV coverage for 18W and 35W handheld devices. (A)  
272 GermAwayUV 18W handheld device and custom test chamber, shown during a coupon  
273 exposure. (B) GermAwayUV 35W handheld device and custom test chamber, shown in the  
274 pre/post exposure state. (C) and (D) UV coverage heat maps for the 18W device (C) and the  
275 35W device (D) taken 5 cm from the source.

276 The sliding tray was constructed to hold a sterile Petri dish via guides and included a stop  
277 bar to ensure that the sample would be consistently positioned directly under the center of the  
278 UV source for maximum exposure. A cardboard barrier was placed over the opening of the  
279 chamber to prevent premature UV exposure onto test coupons when the materials were outside  
280 the test chamber. The plastic lid was removed from the Petri dish prior to UV exposure and the  
281 dish was wide enough that the dish edges did not impede UV transmission.

282 A N=5 was tested for each material at each time point. Each of the 5 coupons was  
283 inoculated with an independent virus preparation, emphasizing statistical accuracy over  
284 precision, and 3 separate exposures were tested for a total N=15. Test chambers held the UV  
285 source at a distance of 5 cm from the coupons, with the exception of keyboard keys. The  
286 keyboard keys were taller and the distance from the UV bulb was 4.28-4.38 cm. The 18W and  
287 35W handheld devices emitted steady state intensities of 10.12 mW cm<sup>-2</sup> and 6.9 mW cm<sup>-2</sup>  
288 respectively at the geometric center under the device. Test coupons were exposed to 10 or 20  
289 seconds (s) of UV-C radiation from the 18W handheld and 2, 5, or 10 s of UV-C radiation from  
290 the 35W handheld. Different exposure times for the two devices were chosen based on pre-  
291 experimental predictions that were considered for practical application of the devices in a field  
292 setting. Prior to testing it was assumed that 35W radiation would exceed 18W and 10 s was a  
293 common time variable for both the 18W and 35W handhelds. During testing, the ambient  
294 environment was 22±2°C and 40% RH. The surface temperature within the test chamber reached  
295 36°C under the 18W device and 48°C under the 35W device. Following UV exposure, coupons  
296 were transferred using sterile forceps to 50 ml conical tubes for extraction.

#### 297 Prototype Handheld devices (272 nm LED and 222 nm Lamp Modules)

298 Two additional handheld devices were tested for efficacy of virus inactivation, which  
299 were prototypes rather than commercial units. The first prototype was one of two custom 3-D  
300 printed proprietary units and featured eight LED strips which emitted 272 nm wavelength UV-C  
301 light. The face of the handheld was 320 mm x 100 mm with the LED strips covering 255 mm x  
302 60 mm. An average intensity of 12.71 mW cm<sup>-2</sup> was measured within a decontamination  
303 footprint of 6 cm x 25.5 cm at 5 cm standoff distance from the bulb (**Figure 2A and 2B**). The  
304 second prototype device utilized three 222 nm UV-C Excimer Lamp Modules installed into a  
305 2.54 cm thick white plastic panel with power supply. It is important to note that this was strictly  
306 an early prototype undergoing iterative improvements, and the UV sources were spaced too far  
307 apart for a wand configuration. An average intensity of 1.54 mW cm<sup>-2</sup> was measured at 5 cm  
308 standoff distance from an individual module (**Figure 3A and 3B**).

309

310

311



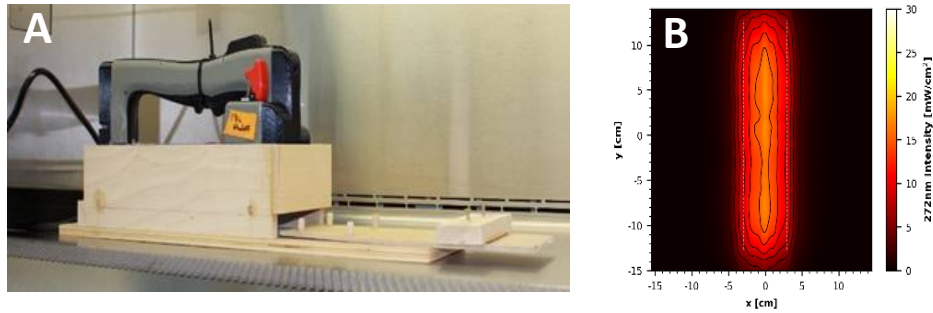

312

313 **Figure 2. (A)** Prototype 272 nm LED handheld inside wooden test chamber. **(B)** UV coverage  
314 heat map taken 5 cm from the source.

315

316

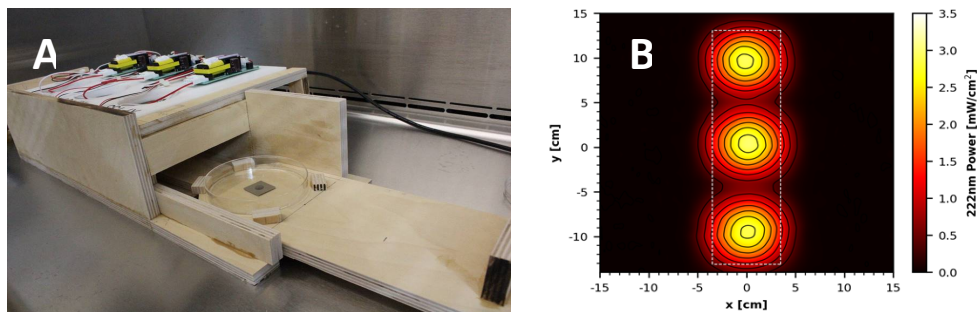

317

318 **Figure 3. (A)** Prototype 222 nm Excimer Lamp Module Board inside wooden test chamber. **(B)**  
319 UV coverage heat map taken 5 cm from the source.

320

321 The wooden test chambers for the prototype handhelds followed the same design as those  
322 for the 18W and 35W devices, with the additional feature of a wooden barrier that removed the  
323 need for cardboard to prevent premature UV exposure onto test coupons when the materials were  
324 outside the UV chamber. Again, there was a 5 cm vertical standoff distance from the UV light  
325 source to the surface of the test coupons. Mimicking the 18W and 35W handheld unit tests, the  
326 devices were powered on 30 min prior to testing to warm up and remained powered on for the  
327 duration of the test. An Ophir Spiricon Starbright Dosimeter (S/N 949685, P/N 7201580) and  
328 sensor (S/N 954282, P/N 7Z02479) were used to confirm that the 222 nm device was on and  
329 emitting 222 nm UV radiation, as the design of the prototype did not allow visual confirmation  
330 that the light was on after it was plugged in. The test chambers and handheld UV devices were  
331 wiped down with pH6.8-adjusted bleach prior to being positioned inside a BSC for testing.

332 A N=5 coupons for each material were tested at each time/dosage with each coupon  
333 inoculated with an independent virus preparation. During tests, virus-inoculated coupons were  
334 transferred singly to sterile Petri plates and inserted into the test chambers via the sliding tray for  
335 timed UV exposures at the geometric center of the handheld device. For the 272 nm device, the

336 cardboard coupons were anchored down using sterile pipette tips due to the large amount of air  
337 movement generated by the cooling fans of the device. In the 272 nm prototype, coupons were  
338 exposed to a steady state intensity of  $15.6 \text{ mW cm}^{-2}$  measured at the geometric center of the  
339 device with a 5 cm standoff distance. Similarly, the 222 nm prototype emitted an intensity of  
340  $2.96 \text{ mW cm}^{-2}$  at a similar location centered under a single lamp module. Following UV  
341 exposure, the coupons were transferred to 50-ml conical tubes for extraction. For both devices,  
342 test coupons were exposed to UV-C radiation for 2, 5, or 10 s. For the 272 nm device, the  
343 ambient environment during testing was  $21 \pm 2^\circ\text{C}$  and 21% RH and the surface temperature under  
344 the sterilizer reached  $34.7 \pm 2^\circ\text{C}$ . For the 222 nm device, the ambient environment was  $21.8 \pm 2^\circ\text{C}$   
345 and 20% RH and the surface temperature reached  $28.3 \pm 2^\circ\text{C}$  within the test chamber.

#### 346 Prototype Mounted Pulsed Xe Unit for Room Decontamination

347 A prototype room-decontamination unit featuring a pulsed Xe UV bulb was tested. The  
348 unit consists of a pulsed Xe bulb within a frame intended to be mounted onto a wall, ceiling, or  
349 mobile tripod for room decontamination. The UV source emitted a small burst of broad-spectrum  
350 light every 6 s with the burst lasting for a short duration. The light spectrum included UV-C,  
351 UV-B, UV-A, and violet-blue light. Reflector material was positioned behind the source to  
352 enhance UV output.

353 Testing of the modified prototype took place within an enclosure provided by the vendor.  
354 The device was mounted at a 2-m, 1-m, and 0.5-m vertical standoff distance above the testing  
355 surface. Test coupons were placed below the prototype in sterile petri dishes and aseptic  
356 technique was employed to the greatest extent possible while outside of a BSC, to prevent  
357 contamination. The coupons contained within Petri dishes were uncovered just prior to the test  
358 and re-covered at the conclusion of the exposure times. Independent tests were run for 3  
359 exposure times (15, 30, and 60 min), each taken at 0.5-m, 1-m, and 2-m distances from the UV  
360 source. These time increments were determined via the recommended cycle lengths from the  
361 vendor and corresponded to vendor test data (30 and 60 min only). The device was pre-  
362 programmed for 30 min run times, therefore for the 15-min increment, coupons were removed  
363 from the enclosure without shutting off the device after 15 min had elapsed from the time of the  
364 first flash. For the 60-min cycle, two decontamination cycles were run sequentially.

#### 365 Commercial Rolling Units for Room Decontamination

366 Two commercial rolling units designed for room decontamination were purchased. The  
367 first was the Xenex Lightstrike (Model PXUV4D, S/N 002628, Xenex Disinfection Systems, San  
368 Antonio, TX, USA), which contained one pulsed Xe bulb (broad spectrum across the germicidal  
369 spectrum of 200-315 nm), which extends and retracts at the top of the unit and pulsed at a rate of  
370 67 flashes per s. An average intensity of  $0.02 \text{ mW cm}^{-2}$  was measured at a 1.78 m standoff  
371 distance from the bulb, but intensities and dosages at specific wavelengths were not carefully  
372 analyzed/dissected since this work was not aimed at correlating specific wavelength dosages  
373 within a broad spectrum to kill. The second unit was the Light Emitting Module (“LEM,” Rapid  
374 UV-C Disinfection Model R3, S/N 473, 120V/12A, STERILIZ, LLC, 150 Linden Oaks,  
375 Rochester, NY 14625-2802), which contained a ring of twenty Hg bulbs with a 41-cm diameter  
376 that emitted predominantly 254 nm wavelength UV-C light. The device was tested at an  
377 exposure distance of 2.63 m from the center of the Hg bulb ring. The length of exposure was

378 controlled based upon the cumulative dosage recorded via the LEM system dosimeters placed  
379 next to the test coupons and targeted for exposures of 60, 100, and 140 mJ cm<sup>-2</sup>. Coupons were  
380 exposed to an average intensity calculated to be 0.23-0.24 mW cm<sup>-2</sup>. Due to the different  
381 intensities of the UV sources, the devices were set at different distances from test coupons to  
382 achieve similar dosages in an attempt to directly compare the killing efficacy of a broad  
383 spectrum light source to a 254 nm source.

384 For testing, the Xe or Hg rolling units were positioned in the corner of a triangular area  
385 and non-reflective folding panels were set up to prevent UV light exposure to personnel outside  
386 of the decontamination area. Magnets were glued to the underside of test coupons prior to  
387 inoculation of virus and a black, non-reflective, metal sheet rack was utilized as a support for the  
388 test coupons. The rack was bent into a curved shape in an attempt to maintain a constant UV  
389 exposure distance to all coupons. Testing of these two devices required transport of coupons to  
390 the testing site, and coupons were transported in 50 ml conical tubes at room temperature.  
391 Negative control coupons as well as additional shipping controls (inoculated and transported, but  
392 not exposed to UV light) were also included. Conditions in the testing room were not aseptic but  
393 care was taken to avoid contamination at each step and coupons were only transferred to and  
394 from the metal rack using sterile forceps. After UV exposure, samples were transferred to new  
395 sterile conical tubes and transported back to the microbiology lab for virus extraction and  
396 quantification.

397 Specific testing conditions differed slightly between the two rolling units. For testing the  
398 Xenex Lightstrike, the metal stand holding virus-inoculated test coupons was placed such that  
399 the coupon height was between 1.09 and 1.55 m above the ground (approximately parallel to the  
400 height of the pulsed Xe bulb) and the distance between the coupons and the UV light source was  
401 1.72-1.78 m. Based on preliminary dosage readings, the Xenex Lightstrike did not need a 30-min  
402 warm up time. Two time points of 5 and 20 min were tested. Room conditions were measured at  
403 23.3±1°C and 74% RH for the first exposure and 25.1±1°C and 22% RH for the second  
404 exposure. As the tests occurred in succession approximately 30 min apart, the shift in  
405 environmental conditions with the rise in temperature and drop in humidity is speculated to be  
406 driven by Xe unit itself. Additionally, the smell of ozone was detected in the air following the  
407 completion of each test.

408 For testing the LEM, the metal stand holding virus-inoculated test coupons was placed  
409 such that the coupon height was approximately 1.2 m above the ground (parallel to center of the  
410 Hg bulbs) and the distance between the center of the ring of UV bulbs to the center of the metal  
411 arc with coupons was approximately 2.62 m. The distance between the test coupons and the  
412 nearest UV bulb was 2.43m. Testing for this device included three independent exposures of 60,  
413 100 and 140 mJ cm<sup>-2</sup> which took 4 min 22 s, 7 min 2 s, and 9 min 33 s, respectively. The  
414 exposure conditions were 26±1°C, 38% RH. Ozone level in the room was measured at 0.08 ppm  
415 for the LEM, compared to 0.26 ppm for the Xenex Lightstrike (0.1 ppm is the 8-h Occupational  
416 Safety and Health Assessment (OSHA) limit).

#### 417 Prototype Medium Conveyor

418 The prototype medium conveyor featured a chamber measuring 2.03 m long x 0.78 m  
419 wide x 0.69 m tall that was lined on all interior surfaces with UV-C emitting (254 nm) Hg bulbs,

420 including below the powered rollers (**Figure 4**). Testing of this device required transport of  
421 coupons to the testing site, and coupons were transported in 50 ml conical tubes at room  
422 temperature. Negative control coupons as well as additional shipping controls (inoculated and  
423 transported, but not exposed to UV light) were also included.

424 Two rounds of testing were performed with the conveyer device, with slight differences  
425 in experimental setup and UV dosages. For both rounds, dosimeters were first used in trial-and-  
426 error runs to determine the required run-through time to reach the target UV exposures. The  
427 dosimeters used were Roithner LaserTechnick GmbH GIVA-S12SD dosimeters from Vienna,  
428 Austria, with dimensions of 4.3-cm x 3.5-cm x 1.8-cm. In the first round of experiments, three  
429 dosimeters were horizontally taped to a 2% polyethylene board (46.7-cm x 28.6-cm x 2.54-cm)  
430 and were sent through the conveyor to get dosage readings based on exposure time (**Figure 4**).  
431 After target exposure times were determined, coupons were placed inside sterile Petri dishes and  
432 set on the same polyethylene support board before exposure in the conveyer. The first round of  
433 testing included exposures of 60 mJ cm<sup>-2</sup> (22 s), 100 mJ cm<sup>-2</sup> (32 s), and 140 mJ cm<sup>-2</sup> (44 s).  
434 Conditions within the conveyer for this round were 27.7 °C, 63.2% RH, 0.09 ppm ozone.

435 In the second round of testing, the initial runs were again dosimeter-only to determine  
436 exposure times to reach the targeted UV dosages. The same dosimeters were used, but this time  
437 they were placed on a ceramic tile (~45.7-cm x 45.7-cm). During testing, coupons were placed  
438 directly on the ceramic tile support to prevent the sides of the Petri dishes from blocking any UV  
439 light from reaching the coupons. Test conditions were 17.3±1°C and 20.1% RH. Ozone reading  
440 was not captured since the ozone reader was unavailable.

441

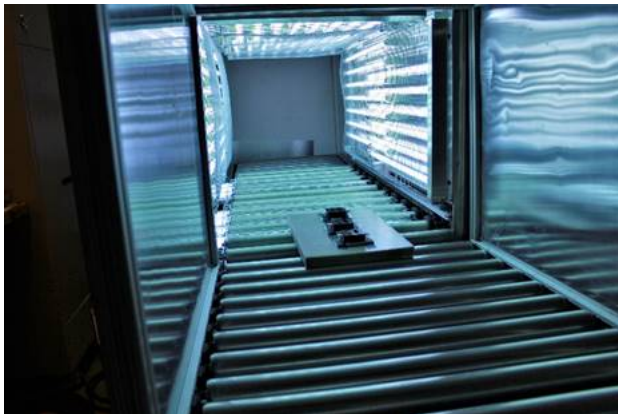

442

443 **Figure 4.** Dosimeters traveling down conveyor to determine exposure times for target UV dosages.

444

#### 445 Prototype Big Box UV Chamber for Pallets

446 A prototype Big Box UV Sterilizer, a proprietary UV-C decontamination device, was  
447 acquired for virus inactivation testing. The outside dimensions were 2.74-m x 2.24-m x 2.4-m  
448 with an interior large enough to accommodate a recommended maximum load with dimensions

449 of 1.21-m wide x 1.21-m long x 1.52-m tall. Max interior load was 1,134 kg. The interior was  
450 lined on five surfaces with a total of 320 T8 Hg bulbs, each measuring 0.9 m long and emitting  
451 254 nm UV-C light. A double-stacked pallet mock-up of dimensions 1.02-m x 1.1.22-m x 1.64-  
452 m was placed within the UV chamber (**Figure 5**), centered from left to right and positioned up  
453 against the rear backstop on the base of the chamber.

454 During testing, coupons were placed in Petri dishes on top of the pallet in five separate  
455 locations, with lids removed prior to exposure. The UV chamber doors were closed, and the  
456 chamber was operated via a pre-programmed cycle set to run for 2 min followed by a 30 s  
457 exhaust. After UV exposure, the coupons were recovered and the surviving virus was extracted  
458 and quantified. There was a single combined 2 min exposure test run for all coupons except for  
459 ABS plastic coupons, which was tested for 2 min on a separate test day. Room temperature  
460 extraction control samples were transported to and from the test location along with test  
461 coupons. Peak ozone generated was 0.36 ppm which is purged prior to opening the doors.

462

463

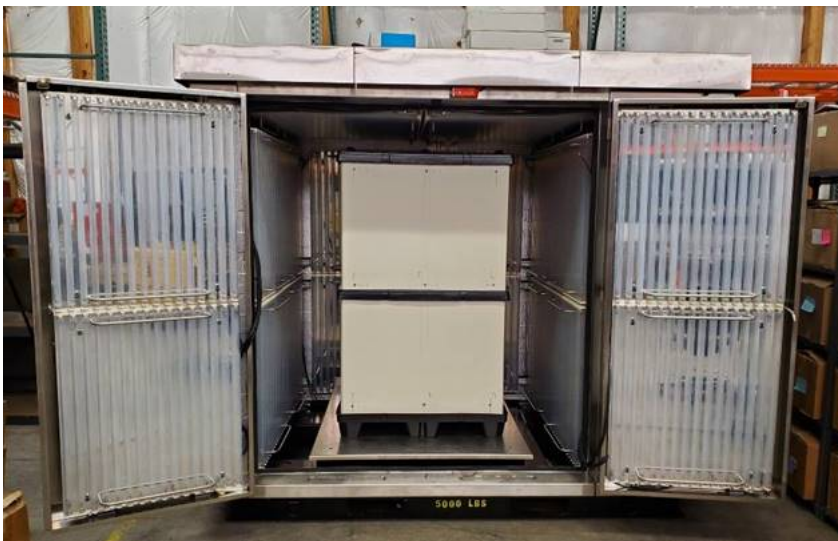

464

465 **Figure 5.** Prototype Big Box UV-C Chamber with a double stacked pallet.

466

#### 467 Prototype Fixed UV Devices for Room Decontamination

468 Three prototype devices were also tested that were intended to be installed on the ceiling  
469 or wall to provide viral decontamination of the air. These devices followed the same general  
470 concept but differed slightly in design and were tested in iterations that featured different UV  
471 light sources (Hg and KrCl bulbs). Test setup for these devices was largely similar to the  
472 previous devices, with each test being carried out for five coupons, each inoculated from one of  
473 five independent viral preparations. Sterile control and extraction control coupons were also  
474 included. However, only one coupon material was tested for each device. Because the purpose of

475 these devices is air decontamination, the specific test material employed here was not  
476 particularly important so long as the material was non-porous with high extraction efficiency and  
477 the materials provided no additional decontamination properties. SS304 was initially used for  
478 testing, and was later replaced by quartz glass in one case as it allows greater UV transmittance  
479 to maximize the surface area that would be exposed to UV light, similar to the way air particles  
480 would be exposed at all angles to direct or reflected UV-C light. Tests were carried out for 5, 10,  
481 and 15 s for each device, though the distance from the UV source differed for each device as  
482 described below. For all experiments, the devices were powered on for at least 30 min prior to  
483 testing to mitigate any start-up fluctuations in UV output.

#### 484 Prototype Device A (Hg bulb and KrCl bulb iterations)

485 Prototype device A featured an internal UV light source within an enclosed chamber.  
486 Fans controlled flow into the chamber where air was exposed to UV-C radiation and then  
487 exhausted through vents opposite from the fans. The first prototype contained two Philips TUV  
488 15W/G15 T8 mercury bulbs emitting 254 nm UV-C light. Three fans were mounted in the device  
489 to provide airflow at 3,030 l min<sup>-1</sup> total through an effective inner volume of 24.64 l. This leads  
490 to a residence time of 0.49 s that air will be exposed to UV radiation within the upper chamber.  
491 Exposures were at 5-cm, 10-cm, and 15-cm from the UV source.

492 The second iteration of device A replaced the dual Hg bulb with a single, custom KrCl  
493 excimer bulb from Far-UV Sterilay that emitted 222 nm UV-C, with the goal of developing a  
494 device with good decontamination efficacy that also posed less of a hazard to personnel exposed  
495 to the light source. The modified device A also included Teflon reflective surfaces to resist dirt  
496 build-up and provide reflectance of the UV-C light. High purity non-crystalline-fused silica glass  
497 plates, also called quartz glass, were added to channel airflow parallel to the UV-C source and  
498 increase the total contact time between contaminated air and the UV-C light. This increased the  
499 total UV dosage applied to air in the unit, thereby providing greater efficacy. The modified  
500 prototype device featured three fans providing 1,700 l min<sup>-1</sup> of airflow each into the unit. One fan  
501 is always operated with the UV-C power switch. Two additional power switches are present for  
502 each additional fan, therefore, the device can operate at 1,700, 3,400, and 5,100 l min<sup>-1</sup> airflow.  
503 The effective interior volume was 24.33 l.

504 The efficacy of the UV light source within the modified device A (KrCl bulb) was tested  
505 with the lid attached. Inoculated quartz glass test coupons were placed individually into a tray  
506 and slid inside the unit through slots cut in the frame. Slots were cut at set distances of 4, 10, and  
507 20 cm from the center of the UV bulb. These distances were aligned to prominent design features  
508 in the box. The 4-cm test distance (4-cm from the center of the bulb or 2-cm from the edge of the  
509 bulb) aligned to an average distance from the bulb in the middle or second air flow channel. The  
510 10-cm distance aligned to the outer channels just behind the quartz glass, and the 20-cm distance  
511 also aligned to the outer channels behind the glass at the furthest distance within the device  
512 where air would be exposed to UV-C.

#### 513 Prototype Device B (Hg bulb and KrCl bulb iterations)

514 Prototype device B featured a single UV-C source in an open-ended unit. Fans directed  
515 airflow into the underside of the unit, and air then exited the frame under and past the UV-C

516 source and then out into the surrounding room air. As with device A, two iterations of the design  
517 were tested. The first iteration contained one Philips TUV PL-L 36W/4P Hg bulb. Device B  
518 was designed to be mounted to a wall and featured one fan to draw air upwards from underneath the  
519 device and exhaust out the top and upper sides. It required a mounting height of 2.15 m in order  
520 to ensure that no humans or pets are exposed to the UV-C light coming out the sides of the  
521 device. Test exposures for this device were conducted at 5-cm, 10-cm, and 15-cm from the UV  
522 source for 5, 10, and 15 s each. Coupons were placed in plastic Petri dishes with lids removed for  
523 exposures.

524 The second version of device B contained one KrCl excimer bulb emitting 222 nm UV-C  
525 light, the same bulb as in the second iteration of device A. With replacement of the 254 nm Hg  
526 bulb with 222 nm UV emission, it no longer had the strict requirement of a 2.15 m mounting  
527 distance, according to the prototype developer. However, 222-nm UV light exposure were still a  
528 concern for Navy personnel. Device B contained limited Teflon as a reflective surface placed  
529 near the bulb to direct and concentrate light outward. Unlike device A, device B does not feature  
530 a closed compartment where reflectivity with the Teflon can occur (substantially removing that  
531 potential for an increase in applied dosage). The device featured a recessed UV compartment  
532 between 10-15 cm deep with cross sectional area 38.7-cm x 11.4-cm. The compartment was  
533 angled upward at approximately 45° from vertical to exhaust air and provide continuous UV  
534 exposure of ambient air. The average measured airflow at the compartment outlet was 2,237 l  
535 min<sup>-1</sup>. Test exposures for this device were conducted at 5, 15, and 30.5, 61 and 122 cm from the  
536 UV source for 5, 10, and 15 s each. Coupons were placed in plastic Petri dishes with lids  
537 removed for exposures.

### 538 Prototype Device C (Hg bulb type only)

539 Prototype device C followed a similar concept to device B, with a slightly different  
540 configuration and form factor. It was designed to be mounted to a wall and featured one Philips  
541 TUV 36W/G36 T8 Hg bulb and two internal fans, with the fans placed to draw air upwards  
542 through the unit to exhaust out the top and upper sides. Like device B, it requires a mounting  
543 height of 2.15 m in order to ensure that no humans or pets are exposed to the UV-C light coming  
544 out the upper sides of the device. Test exposures for this device were conducted at 5, 10 and 15  
545 cm from the UV source for 5, 10, and 15 s each. Coupons were placed in plastic Petri dishes with  
546 lids removed for exposures.

### 547 **Φ6 Extraction from Coupons and Plating**

548 An overlay procedure for Φ6 was previously described (Buhr et al. 2020). For Φ6  
549 extraction from materials (coupons), 5 ml of 10mM HEPES + 10% sucrose pH7 were added to  
550 each conical tube with a virus-inoculated coupon and vortexed for 2 min. After vortexing, 5 ml  
551 of HB10Y log-phase culture (confirmed with real-time Coulter Multisizer analysis) were added  
552 and allowed to infect at RT for 15 min, followed by 2 min of vortexing. Each sample was serially  
553 diluted, from -2 to -6, in 900 μl of 10 mM HEPES + 10% sucrose pH7. For each Φ6 dilution,  
554 from -1 to -6, 200 μl were transferred into individual tubes containing 200 μl log-phase HB10Y.  
555 Then 200 μl of those Φ6/HB10Y mixtures were added to individual TSB overlay tubes, poured  
556 onto individual TSA plates and allowed to solidify for ≥30 min. Additionally, 1,000 μl was  
557 transferred from the 50 ml sample conical tube directly to a TSB overlay tube, and the remaining

558 8.3 ml was poured onto two TSA plates, and also allowed to solidify for  $\geq 30$  min. Solidified  
559 plates were then inverted, incubated for  $20 \pm 2$  h at  $26^\circ\text{C}$  and quantified. Plates were incubated  
560 an additional 24 h, RT and quantified a final time.

561 Quantitation and calculations of survival were performed as previously described (Buhr  
562 et al. 2020). An important difference between virus and prior spore quantitation is that virus and  
563 spore inoculum dried on to coupons was stable. However, titers of virus controls stored in  
564 solution were unstable and highly variable. Therefore, virus inoculation titers was defined as  
565 100% extraction, or maximum recoverable virus, and used to calculate extraction efficiency for  
566 each material. This is a key difference compared to spore quantitation because spores are stable  
567 in non-nutrient aqueous solution at temperatures up to at least  $65^\circ\text{C}$  (Buhr et al. 2012).

## RESULTS

568 To increase confidence in decontamination results and to conservatively estimate  
569 decontamination requirements for enveloped virus in its native state, enveloped virus test  
570 coupons were prepared to be protected similar to a natural virus without interfering with the  
571 virus assay. Respiratory illnesses are typically caused by particles within the  $0.5\text{-}6\ \mu\text{m}$  size range  
572 since particles of these sizes aerosolize well and effectively adhere within the lungs (e.g. Hofer et  
573 al. 2021). A typical infectious dried particle of this size usually only contains 0-10 live virions,  
574 while the remainder of the particle ( $>99.9\%$ ) is primarily composed of salt, mucin glycoprotein  
575 (in human airway mucus, 75-90% carbohydrate), and a minor amount of surfactants (Williams et  
576 al. 2006; Vejerano and Marr 2018, Hadi et al., 2020, Stadnytskyi et al. 2020). Thus,  $\Phi 6$  virus  
577 was unpurified to maintain natural stabilization with host cell debris, and was diluted in a 10%  
578 sucrose solution to mimic the presence of carbohydrates in mucus without inhibiting the  
579 decontamination assay (Brakke 1951, Malenovska 2014, Buhr et al. 2020, Hadi et al. 2020,  
580 Stadnytskyi et al. 2020). In addition, enveloped virus was dried on coupons prior to testing since  
581 SARS-CoV-2 respiratory particles evaporate within seconds to generate dry particles, and drying  
582 on fomites is also historically documented as a route of infection for enveloped virus (Fenn 2001,  
583 Malenovska 2014, Hadi et al. 2020, Stadnytskyi et al. 2020).

584 Enveloped virus stability had been confirmed previously: purified virus was unstable, but  
585 unpurified virus was stable and could be stored dried onto coupons for at least 2 weeks prior to  
586 extraction (Buhr et al 2020). Furthermore, there was no  $\Phi 6$  inactivation after unpurified virus  
587 was dried onto different surfaces for at least 24 h, RT followed by a 10 d exposure to  $26.7^\circ\text{C}$  at  
588 80% RH, and only  $2.4\ \log_{10}$  inactivation was seen after treatment at  $70^\circ\text{C}$ , 5% RH for 24 h (Buhr  
589 et al 2020). More work will be needed to confirm that  $\Phi 6$  and SARS-CoV-2 are stabilized  
590 similarly in the presence of carbohydrates and mucus, and after drying, but the first challenge is  
591 to generate sufficient SARS-CoV-2 virus to match the titers (and statistical confidence) of the  $\Phi 6$   
592 tests. This goal has not yet been met. In addition, neither SARS-CoV-2 nor BSL-2 virus field  
593 testing is likely to happen with regularity.

594  
595 The original quantitative objective was to show enveloped virus inactivation of  $\geq 7\ \log_{10}$   
596 out of a  $\geq 8\ \log_{10}$  challenge. This challenge level was set because measurements with high  
597 concentrations of microbes greatly increase the confidence in inactivation and mitigate the risk



598 of incomplete decontamination (Hamilton et al 2013). Furthermore, an individual highly infected  
599 with SARS-CoV-2 can emit  $>8 \log_{10}$  virus particles in a 24 h period based on published data, and  
600 coronavirus nasal swabs showed  $>8 \log_{10}$  virus per swab as calculated using a PCR assay (Leung  
601 et al. 2020; Stadnytskyi et al. 2020). High challenge levels also increase confidence since  
602 exposure limits (infectious dosages) are not well defined for many viruses such as SARS-CoV  
603 and SARS-CoV-2. UV light does not fall under the United States Environmental Protection  
604 Agency (EPA) jurisdiction for disinfection claims since it is not classified as a chemical  
605 disinfectant. However, for this study, the inactivation goal was reduced from  $7 \log_{10}$  to  $3 \log_{10}$   
606 inactivation during the COVID-19 pandemic to match the EPA N-list for decontaminants. This  
607 was helpful because inactivation numbers for sanitation, disinfection and sterilization could be  
608 used for technical assessments (Rutala et al. 1996). The  $\geq 8 \log_{10}$  challenge was maintained to  
609 meet confidence requirements for end users. This also met the goal of previous work where a  $\geq 7$   
610  $\log_{10}$  virus challenge was a threshold and  $\geq 8 \log_{10}$  virus challenge was an objective (Buhr et al.  
611 2014).

## 612 UV Handheld Devices

613 Two commercial handheld UV devices, the GermAway 18W and 35W handheld  
614 sanitizers, and two prototype handheld UV devices, a 272 nm LED prototype and a 222 nm  
615 prototype, were tested. The dosage and virus inactivation results are summarized in **Tables 1**  
616 ( $\log_{10}$  reduction) and **2** ( $\log_{10}$  survival). Dosages and virus inactivation were measured at a 5 cm  
617 distance, which was considered a reasonable, practical distance for a handheld device used to  
618 scan over surfaces. The keyboard keys were slightly taller and closer to the light source. Thus,  
619 the dosage on the keys was slightly greater than the other materials but no dosage calculations  
620 were made specifically for those keys.

621  
622 To evaluate the efficacy of the devices, a minimum of  $3\text{-}\log_{10}$  inactivation was targeted,  
623 which is equivalent to a 99.9% reduction and corresponds to the current EPA requirements for  
624 chemical disinfection. A 10 s exposure with the GermAway 18W unit failed to meet the  $\geq 3 \log_{10}$   
625 inactivation threshold for all tested materials. A 20 s exposure successfully achieved a greater  
626 than  $3 \log_{10}$  inactivation out of an  $8.2 \log_{10}$  virus challenge on SS304, NTC, keyboard keys, and  
627 polyurethane but failed to meet the  $3 \log_{10}$  inactivation threshold on cardboard.

628  
629 The GermAwayUV 35W handheld sanitizer failed to meet the  $\geq 3 \log_{10}$  inactivation  
630 threshold out of an  $8 \log_{10}$  PFU virus challenge on all five materials for all three exposure  
631 durations, achieving less than  $2 \log_{10}$  PFU inactivation. The GermAwayUV 35W handheld  
632 sanitizer delivered lower dosage than the 18W handheld despite nearly double the power. Hence  
633 there was no correlation between power and dosage/efficacy, and the importance of measuring  
634 every device was apparent.

635  
636 The 272 nm LED prototype successfully achieved a  $\geq 3 \log_{10}$  PFU inactivation out of an  
637  $8.5 \log_{10}$  PFU virus challenge for SS304 at 2, 5, and 10 s, for ABS at 5 and 10 s, and for NTC  
638 and polyurethane at 10 s. The hardest, smoothest material was SS304 and it showed the greatest  
639  $\log_{10}$  reduction at all 3 time points. Cardboard showed the lowest inactivation rate with no  
640 treatments providing  $\geq 3 \log_{10}$  PFU inactivation. Overall, the 272nm LED prototype showed  
641 significantly greater virus inactivation compared to the 18W and 35W handheld commercial  
642 devices.

643  
644 The 222nm Excimer UV prototype failed to achieve a  $>3 \log_{10}$  inactivation out of an 8.5  
645  $\log_{10}$  virus challenge for all 5 materials tested, making it the least effective of the four handheld  
646 devices tested. Further testing with longer exposure times might produce results passing the  $\geq 3$   
647  $\log_{10}$  inactivation threshold. From a practical standpoint this data showed that this 222 nm  
648 prototype had poor efficacy and very limited utility. Since this was a prototype, iterative  
649 improvements can be made to improve performance of this device.

#### 650 Room Decontamination Devices

651 Results for a mounted prototype containing a pulsed Xe bulb are shown in **Tables 1**  
652 ( $\log_{10}$  reduction) and **2** ( $\log_{10}$  survival). This device emitted broad-spectrum light in pulses  
653 occurring every 6 s, with the duration of each pulse measured at 0.489 s, and the majority of the  
654 dosage applied over the first few milliseconds of that time. Because of the broad spectrum  
655 nature, the UV dosage could not be confidently measured. This device demonstrated measurable  
656 efficacy at 0.5 m for 60 min and the results were best on non-porous materials. Efficacy was very  
657 limited at 1 and 2 m and shorter exposure times, particularly on porous cardboard, followed by  
658 semi-porous NTC. As usual, the best efficacy was on the smooth surfaces; plastic and SS304.

659 Results for the Xenex Lightstrike unit with pulsed Xe UV bulb are shown in **Tables 1**  
660 and **2**. The Lightstrike emitted pulses at a rate of 67 per s. Test 1 for 5 min occurred at  
661 environmental conditions of  $23.3 \pm 1^\circ\text{C}$  and 74% RH. Test 2 for 20 min occurred at  $25.1 \pm 1^\circ\text{C}$  and  
662 22% RH. The 2 tests occurred in succession approximately 30 min apart, and the smell of ozone  
663 was detected in the air following the completion of each test. Additionally, the Xenex did not  
664 require a warmup time in contrast to devices with Hg bulbs. The Xenex Lightstrike failed to  
665 achieve a  $\geq 3 \log_{10}$  inactivation out of an 8.4  $\log_{10}$  PFU virus challenge for all 5 materials tested.

666 Results for the LEM with Hg bulbs are shown in **Tables 1** and **2**. The LEM successfully  
667 achieved a  $\geq 3 \log_{10}$  PFU inactivation out of an 8.4  $\log_{10}$  PFU virus challenge for SS304 at all  
668 three dosages, for polyurethane at the higher two exposures, and for NTC and keyboard keys at  
669 the highest dosage only. It failed to meet the  $\geq 3 \log_{10}$  PFU inactivation threshold for cardboard at  
670 all three exposure levels.

#### 671 Prototype Medium Conveyer

672 Two rounds of testing were carried out for the prototype medium conveyer with Hg  
673 bulbs, with each round varying in dosages tested and in the method of exposing the test coupons  
674 (see Methods section for this device). The dosages over time were not perfectly linear. The  
675 dosage variability over time might have been variability in dosimeter readings and/or variability  
676 in Hg bulb dosages after warmup. Test results are shown in **Tables 1** and **2**. During round 1  
677 testing at  $60 \text{ mJ cm}^{-2}$  (20 s),  $100 \text{ mJ cm}^{-2}$  (32 s) and  $140 \text{ mJ cm}^{-2}$  (44 s), the conveyer  
678 successfully achieved a  $\geq 3 \log_{10}$  PFU inactivation out of an 8.2  $\log_{10}$  PFU virus challenge for all  
679 three exposure times on SS304, NTC, ABS plastic, and polyurethane, with slightly higher  
680 inactivation results for ABS plastic and polyurethane at the higher two treatments. It failed to  
681 meet the  $\geq 3 \log_{10}$  PFU inactivation threshold on cardboard for all three exposure times.

682 For round 2 of testing, the dosages measured during testing were  $13.7 \text{ mJ cm}^{-2}$  (8s),  $23.8$   
683  $\text{mJ cm}^{-2}$  (16s),  $40.0 \text{ mJ cm}^{-2}$  (24s), and  $56.2 \text{ mJ cm}^{-2}$  (32s). Regardless of dosage variability, the

684 conveyer successfully achieved a  $\geq 3$   $\log_{10}$  inactivation out of an 8.4  $\log_{10}$  virus challenge for  
685 SS304 at 24 and 32 s, for NTC at 32 s, and for ABS plastic at 32 s time points. For all other  
686 materials and round 2 exposure times, it failed to reach the  $\geq 3$   $\log_{10}$  PFU threshold inactivation.

687 **Figure 6** plots the  $\log_{10}$  reduction from the conveyer against dosage on the different  
688 materials. The conveyor produced UV dose-dependent inactivation at lower dosages (13.7-56.2  
689  $\text{mJ cm}^{-2}$ ), but inactivation leveled off across all surfaces tested at higher dosages (60-140  $\text{mJ cm}^{-2}$ ).  
690  $\text{mJ cm}^{-2}$ ). The size of the shielded virus population was dependent on material porosity since the  
691 highest level of inactivation was observed on non-porous SS304, followed by polyurethane, ABS  
692 plastic, NTC, and then porous cardboard. In addition, an additional sub-population of virus  
693 protected by debris was shielded from exposure to radiation because of the presence of host cell  
694 debris as indicated by a flattening of the kill rate across all the materials including smooth  
695 SS304. That sub-population of debris-complexed virus manifest may manifest higher resistance  
696 to the damaging effects of the UV radiation because of both shielding and drying; it is widely  
697 known that UV damage produces covalent bonds in nucleic acid and biochemical reactions  
698 involving bond formation typically require a solvent like water.

699

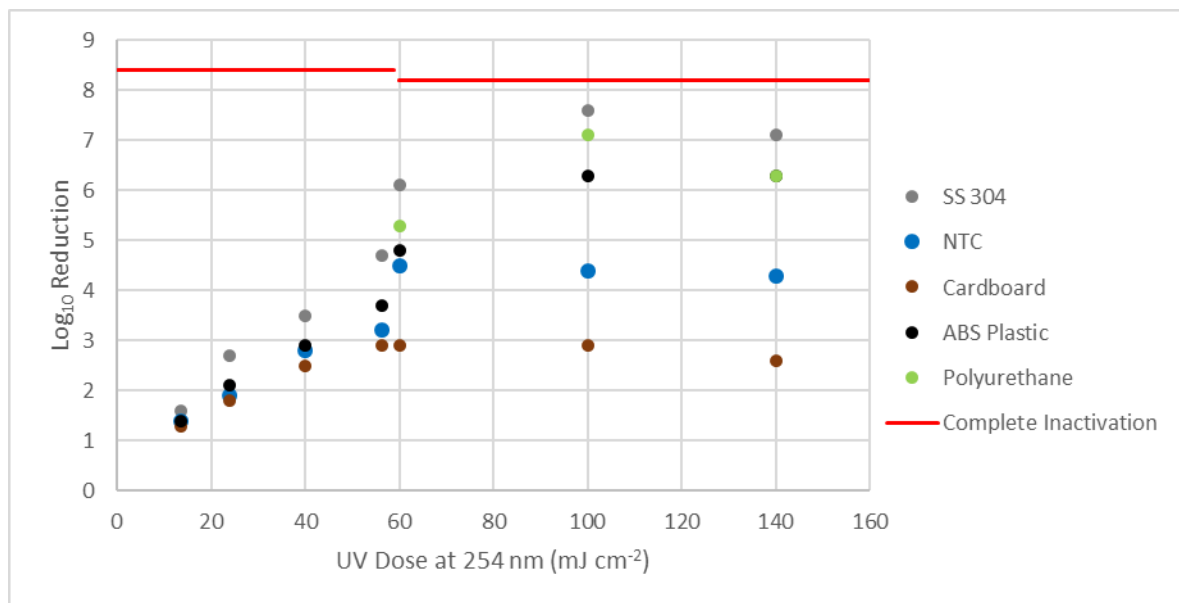

701 **Figure 6.** Prototype Medium Conveyor  $\log_{10}$  reduction.

702

### 703 Prototype Big Box UV Chamber

704 Results for the prototype Big Box UV sterilizer are shown in summary **Tables 1 and 2**.  
705 A large double-stacked pallet mock-up was set inside the Big Box UV sterilizer. Coupons were  
706 then set on top of the plastic and cardboard mock-up for UV exposure, and the distance from  
707 virus-inoculated coupon to the nearest Hg bulbs on the chamber ceiling was 16.5 cm. The  
708 dosages varied significantly at different locations in the box resulting in a dosage range of 377-

709 729 mJ cm<sup>-2</sup> for the test materials. Virus inactivation test results after UV treatment of 8.4 log<sub>10</sub>  
710 PFU of enveloped virus deposited per coupon (8.2 log<sub>10</sub> PFU for ABS plastic) showed a ≥5 log<sub>10</sub>  
711 PFU inactivation for SS304, polyurethane, and ABS plastic and a ≥3 log<sub>10</sub> PFU inactivation for  
712 NTC and cardboard. As for all other devices, the hardest, smoothest material (SS304) was most  
713 effectively treated while the most porous material (cardboard) was hardest to decontaminate.

714 Overall, the prototype Big Box chamber showed higher virus inactivation compared to  
715 almost all other devices, corresponding to the significantly higher UV dosage achieved with the  
716 large number of Hg bulbs in the chamber. The data highlights the overall limitations of UV  
717 technology to provide complete virus inactivation since virus sterilization was not achieved  
718 despite a large, powerful system featuring a total of 320 Philips T8 Hg bulbs.

#### 719 Prototype Fixed UV Devices for Air and/or Surface Decontamination

720 Devices intended for air decontamination represent a challenge because methods to  
721 mimic actual respiratory enveloped virus have yet to be developed. While there are nebulization  
722 protocols for wet purified virus, these methods have little practical relevance for field testing of  
723 environmentally relevant SARS-CoV-2 virus where the virus is protected by mucus (the surface  
724 of which primarily consists of carbohydrate), the infectious particles only consist of ≤0.13%  
725 virus, and the infectious 4 μm particles are dry, not wet (Hadi et al. 2020; Stadnytskyi et al.  
726 2020). For the purposes of this work, the methods for field testing on virus-inoculated surfaces  
727 were maintained in order to comparatively screen and assess the effectiveness of the UV bulbs  
728 used in the different prototypes, particularly since there was so much variability in dosage and  
729 efficacy among different UV sources up to this point. This approach helped with iterative  
730 assessments and prototype improvements.

#### 731 Mounted Prototypes A, B (Hg bulb and KrCl bulb prototypes), and C (Hg bulb type only):

732 Results for the mounted prototype A, B and C are shown in **Tables 3** (log<sub>10</sub> reduction)  
733 and **4** (log<sub>10</sub> survival). For the original prototype A with the Hg bulbs, there was minimal log<sub>10</sub>  
734 reduction at different distances and times against virus-inoculated SS304. A modified prototype  
735 version with a greatly optimized internal configuration and a KrCl bulb was tested against virus-  
736 inoculated quartz glass. Time and cost restrictions prevented a test on virus-inoculated SS304.  
737 The modified prototype A unit was determined to require approximately 5 min for the UV-C  
738 output to stabilize. The device was verified to emit a peak wavelength of 222 nm with a slight  
739 spike at 252 nm likely from the SiO<sub>2</sub> glass casing of the bulb (data not shown). This modified  
740 prototype A unit showed a significant improvement over the original prototype. There were too  
741 many significant changes between the first and second prototypes to isolate any single variable  
742 as the primary reason for the improved efficacy.

743 For the original prototype B with a Hg bulb, there was minimal log<sub>10</sub> reduction at  
744 different distances and times against virus-inoculated SS304. A modified prototype B with a  
745 KrCl bulb emitting 222 nm UV was tested. Test results showed worse efficacy results than the  
746 original prototype B. Overall, this device was the least effective of the wall-mounted prototypes,  
747 and it was not modified as extensively compared to the modified prototype A. The 222 nm KrCl  
748 bulb clearly did not improve efficacy in this prototype.

749 Prototype C had the least favorable design, and given its low efficacy, it was not pursued  
750 for modification.

751

## 752 **DISCUSSION**

753 The focus of this research was to establish reference test methods for UV  
754 decontamination of enveloped virus, and to both assess and accelerate improvements in UV  
755 devices.  $\Phi 6$  was selected as a BSL-1, enveloped RNA virus test indicator for both lab and field  
756 tests.  $\Phi 6$  has been widely used as an enveloped virus surrogate (de Carvalho et al. 2017). It  
757 bears structural similarity to many other enveloped viruses including coronaviruses, suggesting  
758 that the  $\Phi 6$  structure should be similarly susceptible to general decontaminants. Furthermore, the  
759 structural molecules of the virus are produced by host cells with temperature sensitivity at around  
760 40°C, further suggesting that  $\Phi 6$  should be similarly susceptible to general decontaminants as  
761 animal coronaviruses. The capabilities for measuring UV efficacy using both physics-based  
762 equipment and live, enveloped virus test indicators allowed standardized test measurements in  
763 both lab and field tests to directly compare the different UV devices.

764 The UV test results here showed that high UV dosages are needed to inactivate enveloped  
765 virus protected by environmental debris, and porous materials are difficult to decontaminate,  
766 particularly in comparison with purified virus alone. These limitations of UV light are well  
767 documented by regulatory agencies and those limitations also apply to SARS-CoV-2  
768 (Anonymous 2021a and 2021b). Nonetheless, UV efficacy was measurable and very high  
769 dosages were effective even on relatively porous materials like cardboard. It is unlikely that UV  
770 would be useful for highly porous fabrics used to make bags, carpeting and clothing, and those  
771 were not tested. In contrast, hot, humid air inactivates dirty microbes with similar kinetics  
772 regardless of material porosity (e.g. Buhr et al 2012, 2015, 2016, 2020). This is a hallmark  
773 difference between highly penetrative decontaminants and a surface decontaminant like UV.

774 The prototype medium conveyer generated the highest virus inactivation per  
775 dosage. Inoculated coupons were exposed to UV-C light on three sides since the coupons were  
776 set on a flat surface during exposure in the conveyer. The big UV box also generated high levels  
777 of virus inactivation, but the medium conveyer was highest efficacy dose<sup>-1</sup>. In contrast the  
778 handheld devices, pulsed Xenon devices, LEM, and the original prototypes A, B, and C, and  
779 modified prototype B were all evaluated with a UV source emitted from predominantly one  
780 direction with slightly varying angles of exposure. The increased angles of exposure in the  
781 conveyer and big box likely improved UV-C penetration. Hence, the unique geometry, design  
782 and electronics of each device impacted the effectiveness above and beyond the wavelength and  
783 dosage.

784 Anti-viral efficacy among the different UV devices ranged from no decontamination up  
785 to nearly achieving enveloped virus sterilization. Enormous variability in dosage and efficacy  
786 was measured within and among the different devices. This variability strongly indicated that all  
787 UV devices need to be measured for both UV dosage and for anti-viral efficacy before  
788 purchasing and using large numbers of these devices. The efficacy of a pulsed Xe bulb was  
789 measurable at close distances, but significantly lower than Hg bulbs. However, pulsed Xe  
790 devices do have some practical advantages such as requiring minimal warm up time and no Hg

791 toxicity. LEDs are also far more practical than Hg bulbs because LEDs have the lowest hazard,  
792 lowest variability in UV output, and the 272 nm LED showed highest efficacy. However, the  
793 availability of UV LEDs has been limited, and UV dosages can also be limiting depending on the  
794 manufacturer, model, the electronics and overall design of any given device. Longer wavelength  
795 UV (272 nm) showed the best efficacy in handheld devices and 272 nm is more penetrating than  
796 short wavelengths. However, 222 nm KrCl lights showed measurable efficacy in conjunction  
797 with proprietary prototype advancements.

798 Finally, decontamination with UV comes with tradeoffs that affect the decision of the end  
799 user. The time of exposure needed to generate efficacy needs to be assessed by end users because  
800 long exposure times will limit the utility of UV, especially for handheld and air decontamination  
801 devices. Another tradeoff to be assessed by end users is the need for cleaning/maintenance of UV  
802 devices to remove dirt/debris that accumulates on the light sources, and/or change light sources.  
803 Devices and methods to monitor UV dosage over time are needed to assist in maintenance, a  
804 particularly important subject that is rarely addressed. Additional tradeoffs are ozone generation,  
805 which can be toxic, and operation times; Hg bulbs in particular require warmup times in order to  
806 reach a steady-state. In general, Hg bulbs generate a maximum dosage immediately, and then the  
807 dosages were stabilized at a lower level after a warm up period. The Hg devices would have  
808 performed better had only this initial dose been tested, but that data would not translate to  
809 practical application. Lastly, the end user needs an understanding of the organism(s) to be killed,  
810 how it is stabilized in the environment, and the impact of test methods on results, as these factors  
811 will impact confidence in any application. Assessment of these tradeoffs will facilitate practical  
812 application of UV decontamination. As test standards and UV sources improve, UV will become  
813 a more viable option for some decontamination applications. In retrospect, the objective of this  
814 work was to catalyze those improvements.

815

## 816 **ACKNOWLEDGEMENTS**

817 This work was supported through funding and program support provided by Naval Sea Systems  
818 Command, Defense Innovation Unit, Naval Advanced Medical Devices, and the Defense Threat  
819 Reduction Agency (DTRA), Hazard Mitigation Capability Area (BA2 and 3 funds, Project  
820 Number CB10141). We thank Rich Wiersteiner, Jon Cofield, Heather Ichord, Janet Weir, Glenn  
821 Lawson, Chuck Bass, James Noah, John Aaron Miller and Joe Schumer for support. We thank  
822 Jason A. Fallen for outstanding technical support, Kira Baugh and Julie Caruana for assistance  
823 with editing the paper. This manuscript was approved for public release on 1/27/2022 as #6156;  
824 NSWCDD PN-22-00021, and will be released as a pre-print at bioRxiv (Buhr et al.).

825

## 826 **COMPETING INTERESTS**

827 None reported

## 828 **REFERENCES**

- 829 Anonymous - ASTM. (2020). Guidance on SARS-CoV-2 Surrogate Selection.  
830 <https://www.astm.org/COVID-19/> [Accessed on September 15, 2021].
- 831 Anonymous – United States Food and Drug Administration. (2021a). UV Lights and Lamps:  
832 Ultraviolet-C Radiation, Disinfection, and Coronavirus. [https://www.fda.gov/medical-](https://www.fda.gov/medical-devices/coronavirus-covid-19-and-medical-devices/uv-lights-and-lamps-ultraviolet-c-radiation-disinfection-and-coronavirus)  
833 [devices/coronavirus-covid-19-and-medical-devices/uv-lights-and-lamps-ultraviolet-c-radiation-](https://www.fda.gov/medical-devices/coronavirus-covid-19-and-medical-devices/uv-lights-and-lamps-ultraviolet-c-radiation-disinfection-and-coronavirus)  
834 [disinfection-and-coronavirus](https://www.fda.gov/medical-devices/coronavirus-covid-19-and-medical-devices/uv-lights-and-lamps-ultraviolet-c-radiation-disinfection-and-coronavirus). [Accessed on September 15, 2021].
- 835 Anonymous – Environmental Protection Agency. (2021b). Disinfecting Surfaces with UV Light  
836 to Reduce Exposure to SARS-CoV-2. [https://www.epa.gov/covid19-research/disinfecting-](https://www.epa.gov/covid19-research/disinfecting-surfaces-uv-light-reduce-exposure-sars-cov-2)  
837 [surfaces-uv-light-reduce-exposure-sars-cov-2](https://www.epa.gov/covid19-research/disinfecting-surfaces-uv-light-reduce-exposure-sars-cov-2). [Accessed on September 15, 2021].
- 838 Bibby, K., Casson, L.W., Stachler, E. and Haas, C.N. (2015). Ebola Virus Persistence in the  
839 Environment: State of the Knowledge and Research Needs. *Environ. Sci. Technol. Lett.* 2, 2–6.  
840 <https://doi.org/10.1021/ez5003715>
- 841 Brakke, M. K. (1951). Density gradient centrifugation: A new separation technique. *J. Am.*  
842 *Chem. Soc.* 73:1847-1848.
- 843 Buhr, T. L., Young, A. A., Minter, Z.A., Wells, C.M. (2012). Test method development to  
844 evaluate hot, humid air decontamination of materials contaminated with *Bacillus anthracis*  
845  $\Delta$ Sterne and *B. thuringiensis* Al Hakam spores. *J Appl Microbiol* 113, 1037–1051.  
846 <https://doi.org/10.1111/j.1365-2672.2012.05423.x>  
847
- 848 Buhr, T., Young, A.A., Johnson, C.A., Minter, Z., Wells, C., (2014). Decontamination of  
849 materials contaminated with *Francisella philomiragia* or MS2 bacteriophage using PES-Solid, a  
850 solid source of peracetic acid. *J Appl Microbiol* 117, 397-404. <https://doi.org/10.1111/jam.12540>  
851
- 852 Buhr, T., Young, A.A., Barnette, H., Minter, Z.A., Kennihan, N., McPherson, D.C., Johnson,  
853 C.A., Bohmke, M., DePaola, M. and Page, M. (2015). Test methods and response surface models  
854 for hot, humid air decontamination of materials contaminated with dirty spores of *Bacillus*  
855 *anthracis*  $\Delta$ Sterne and *B. thuringiensis* Al Hakam. *J. Appl. Microbiol.* 119, 1263-1277.
- 856 Buhr, T., Young, A., Bensman, M., Minter, Z., Kennihan, N., Johnson, C., Bohmke, M.,  
857 Borgers-Klonkowski, E., Osborn, E., Avila, S., Theys, A. and Jackson, P. (2016). Hot, humid air  
858 decontamination of a C-130 aircraft contaminated with spores of two acrySTALLIFEROUS *Bacillus*  
859 *thuringiensis* strains, surrogates for *Bacillus anthracis*. *J. Appl. Microbiol.* 120, 1074-1084.  
860 <https://doi.org/10.1111/jam.13055>
- 861 Buhr T. L., Young A. A., Borgers-Klonkowski E., Kennihan N. L., Barnette H. K., Minter Z. A.,  
862 Bohmke M. D., Osborn E. B., Hamilton S. M., Kimani M. B., Hammon M. W., Miller C. T.,  
863 Mackie R. S., Innocenti J. M., Bensman M. D., Gutting B. W., Lilly S. D., Hammer E. E., Yates  
864 V. L., Luck B. B. (2020). Hot, Humid Air Decontamination of Aircraft Confirmed That High  
865 Temperature and High Humidity Are Critical for Inactivation of Infectious, Enveloped

- 866 Ribonucleic Acid (RNA) Virus. *Front Bioeng Biotechnol.* Oct 23;8:592621.  
867 <https://doi.org/10.3389/fbioe.2020.592621>
- 868 Chan, K. H., Malik Peiris, J. S., Lam, S. Y., Poon, L. L. M. , Yuen, K. Y. and Seto, W. H.  
869 (2011). The Effects of Temperature and Relative Humidity on the Viability of the SARS  
870 Coronavirus. *Adv Virology*, Article ID 734690, 7 pages. <https://doi.org/10.1155/2011/734690>
- 871 de Carvalho, N.A., Stachler, E.N., Cimabue, N. and Bibby, K. (2017). Evaluation of Phi6  
872 persistence and suitability as an enveloped virus surrogate. *Environ. Sci. Technol.* 51 (15), 8692–  
873 8700. <https://doi.org/10.1021/acs.est.7b01296>
- 874 Fedorenko, A., Grinberg, M., Orevi, T. and Kashtan, N. (2020). Survival of the enveloped  
875 bacteriophage Phi6 (a surrogate for SARS-CoV-2) in evaporated saliva microdroplets deposited  
876 on glass surfaces. *Scientific Reports* 10:22419. <https://doi.org/10.1038/s41598-020-79625-z>
- 877 Fenn, Elizabeth A. (2001). *Pox Americana: The Great Smallpox Epidemic of 1775-82*. New  
878 York: Hill and Wang.
- 879 Gallandat, K. and Lantagne, D. (2017). Selection of a Biosafety Level 1 (BSL-1) surrogate to  
880 evaluate surface disinfection efficacy in Ebola outbreaks: Comparison of four bacteriophages.  
881 *PLOS ONE*. 12(5). <https://doi.org/10.1371/journal.pone.0177943>
- 882 Greiff D., Blumenthal H., Chiga, M., Pinkerton, H. (1954). The effects on biologic materials of  
883 freezing and drying by vacuum sublimation II. Effect on influenza virus. *J Exptl Med* 100(1): 89-  
884 101.
- 885 Greiff D., Rightel, W. (1966). Freezing and freeze-drying of viruses In: HT Meryman (Eds.).  
886 *Cryobiology*. Academic Press, Inc, New York, USA. pp. 697-728.
- 887 Hadi, J., Dunowska, M., Wu, S., and Brightwell, G. (2020). Control Measures for SARS-CoV-2:  
888 A Review on Light-Based Inactivation of Single-Stranded RNA Viruses. *Pathogens* 9: 737-767;  
889 <https://doi.org/10.3390/pathogens9090737>
- 890 Hamilton, M., Hamilton, G., Goeres, D. and Parker, A. (2013). Guidelines for the statistical  
891 analysis of a collaborative study of a laboratory disinfectant product performance test  
892 method. *JAOAC International* 96 (5), 1138-1151. <https://doi.org/10.5740/jaoacint.12-217>
- 893 Heßling, M., Hönes, K., Vatter, P., Lingenfelder, C. (2020). Ultraviolet irradiation doses for  
894 coronavirus inactivation – review and analysis of coronavirus photoinactivation studies. *GMS*  
895 *Hygiene and Infection Control* 2020, Vol. 15, ISSN 2196-5226  
896 <https://dx.doi.org/10.3205%2Fdgkh000343>
- 897 Hendley, J.O., Wenzel, R.P., and Gwaltney, J.M., Jr. (1973). Transmission of Rhinovirus Colds  
898 by Self-Inoculation. *N Engl J Med* 288:1361–1364.



- 899 Hofer, S., Hofstätter, N., Duschl, A., and Himly, M. (2021). SARS-CoV-2-Laden Respiratory  
900 Aerosol Deposition in the Lung Alveolar-Interstitial Region Is a Potential Risk Factor for Severe  
901 Disease: A Modeling Study. *J. Pers. Med.* 11, 431. <https://doi.org/10.3390/jpm11050431>
- 902 Leung, N.H.L., Chu, D.K.W., Shiu, E.Y.C., Chan, K.-H., McDevitt, J.J., Hau, B.J.P., Yen, H.-L.,  
903 Li, Y., Ip, D.K.M., Peiris, J.S.M., Seto, W.H., Leung, G.M., Milton, D.K. and Cowling, B.J.  
904 (2020). Respiratory Virus Shedding in Exhaled Breath and Efficacy of Face Masks. *Nature*  
905 *Medicine* 26, 676-680. <https://doi.org/10.1038/s41591-020-0843-2>
- 906 Malenovska, H. (2014). The influence of stabilizers and rates of freezing on preserving of  
907 structurally different animal viruses during lyophilization and subsequent storage. *J Appl*  
908 *Microbiol* 117, 1810—1819. <https://doi.org/10.1111/jam.12654>
- 909 McDonnell, G., and Burke, P. (2011). Disinfection: is it time to reconsider Spaulding? *J. Hosp.*  
910 *Inf.* 78, 163–170. doi: 10.1016/j.jhin.2011.05.002 <https://doi.org/10.1016/j.jhin.2011.05.002>
- 911 Mindich, L. (2004). Packaging, replication and recombination of the segmented genomes of  
912 bacteriophage  $\Phi 6$  and its relatives. *Virus Research.* 101, 83–92.  
913 <https://doi.org/10.1016/j.viruses.2003.12.008>
- 914 Raiszadeh, M., and Adeli, B. (2020). A Critical Review on Ultraviolet Disinfection Systems  
915 against COVID-19 Outbreak: Applicability, Validation, and Safety Considerations. *ACS*  
916 *Photonics.* 7 (11):2941-2951. <https://doi.org/10.1021/acsp Photonics.0c01245>
- 917 Russell, C. J. (2021). Hemagglutinin Stability and Its Impact on Influenza A Virus Infectivity,  
918 Pathogenicity, and Transmissibility in Avians, Mice, Swine, Seals, Ferrets, and Humans. *Viruses*  
919 13, 746. <https://doi.org/10.3390/v13050746>
- 920 Rutala, W.A. and APIC Committee (1996) APIC Guideline for selection and use of disinfectants.  
921 *Am J Infect Cont* 24:313-342. [https://doi.org/10.1016/S0196-6553\(96\)90066-8](https://doi.org/10.1016/S0196-6553(96)90066-8)
- 922 Stadnytskyi, V., Bax, C. E., Bax, A. and Anfinrud, P. (2020). The airborne lifetime of small  
923 speech droplets and their potential importance in SARS-CoV-2 transmission. *Proc Natl Acad Sci*  
924 117(2), 11875-11877. <https://doi.org/10.1073/pnas.2006874117>
- 925 Tseng, C.C.; Li, C.S. (2005). Inactivation of virus-containing aerosols by ultraviolet germicidal  
926 irradiation. *Aerosol Sci. Technol.* 39: 1136–1142.  
927 <https://dx.doi.org/10.1080%2F15459620701329012>
- 928 Van Etten, J., Lane, L., Gonzalez, C., Partridge, J. and Vidaver, A. (1976). Comparative  
929 properties of bacteriophage  $\phi 6$  and  $\phi 6$  nucleocapsid. *J. Virol.* 18(2), 652–658.
- 930 Vejerano, E.P.; Marr, L.C. Physico-chemical characteristics of evaporating respiratory fluid  
931 droplets. (2018). *J. R. Soc. Interface* 15. <https://doi.org/10.1016/j.jaerosci.2021.105760>

- 932 Vidaver, A.K., Roski, R.K., and Van Etten, J.L. (1973). Bacteriophage phi6: a lipid-containing  
933 virus of *Pseudomonas phaseolicola*. *J. Virol.* 11(5), 799-805.
- 934 Weber, T. P. and Stilianakis, K. I. (2008). Inactivation of influenza A viruses in the environment  
935 and modes of transmission: A critical review. *J. Inf.* 57, 361-373. doi: 10.1016/j.jinf.2008.08.013  
936 <https://doi.org/10.1016/j.jinf.2008.08.013>
- 937 Wiggington, K.R., Pecson, B.M., Sigstam, T., Bosshard, F. and Kohn, T. (2012). Virus  
938 inactivation mechanisms: impact of disinfectants on virus function and structural integrity.  
939 *Environ. Sci. Technol.* 46(21), 12069-12078. <https://doi.org/10.1021/es3029473>
- 940 Williams, O.W.; Sharafkhaneh, A.; Kim, V.; Dickey, B.F.; Evans, C.M. (2006). Airway Mucus  
941 From Production to Secretion. *Am. J. Respir. Cell. Mol. Biol.* 34, 527–536.  
942 <https://doi.org/10.1165/rcmb.2005-0436sf>
- 943  
944  
945  
946  
947  
948  
949  
950  
951

952 **Table 1.** Dosage and efficacy of handheld, room and chamber-type devices showing log<sub>10</sub>  
 953 reduction data. Handheld and room decontaminating devices were tested by exposing coupons to  
 954 UV at use-case exposure distances and times. The conveyer prototype was tested via positioning  
 955 coupons on the rollers in the center of the conveyor, and the big box prototype tested via  
 956 positioning coupons on top of a double-stacked pallet placed inside the unit. Legend: White =  
 957 Fail <2 log<sub>10</sub>; low decontamination; Yellow = Fail ≥2 log<sub>10</sub>, <3 log<sub>10</sub>; sanitation, Light Blue =  
 958 Pass ≥ 3 log<sub>10</sub>; disinfection, and Dark Blue = Pass ≥ 6 log<sub>10</sub>; approaching virus sterilization.  
 959 Dosage is based on the steady state emission, not peak emission. Due to the broad spectrum  
 960 nature of the pulsed Xe bulb, dosage could not be accurately calculated. N/A – dosage  
 961 measurements had no meaning because of the broad spectrum light source.

| Name                              | Description                                                                                       | Dosage (mJ cm <sup>-2</sup> ) | Exposure Distance | Exposure Time | Efficacy (Log <sub>10</sub> Reduction after an >8 log <sub>10</sub> challenge of live Φ6) |           |           |                   |              |
|-----------------------------------|---------------------------------------------------------------------------------------------------|-------------------------------|-------------------|---------------|-------------------------------------------------------------------------------------------|-----------|-----------|-------------------|--------------|
|                                   |                                                                                                   |                               |                   |               | SS 304                                                                                    | NTC       | Cardboard | Keyboard Keys/ABS | Polyurethane |
| GermAway UV 18W Handheld          | 2 12.7 cm Hg U-shape bulbs in handheld device<br>254 nm UV-C<br>MSRP \$100                        | 101.2                         | 5 cm              | 10 s          | 2.5 ± 0.1                                                                                 | 2.0 ± 0.0 | 1.9 ± 0.0 | 1.9 ± 0.0         | 2.0 ± 0.0    |
|                                   |                                                                                                   | 202.4                         | 5 cm              | 20 s          | 4.3 ± 0.2                                                                                 | 3.1 ± 0.2 | 2.0 ± 0.1 | 4.5 ± 0.1         | 3.3 ± 0.1    |
| GermAway UV 35W Handheld          | 2 22.5 cm Hg twin tube bulbs in handheld device<br>254 nm UV-C<br>MSRP \$450                      | 13.8                          | 5 cm              | 2 s           | 0.3 ± 0.0                                                                                 | 0.2 ± 0.0 | 0.3 ± 0.0 | 0.3 ± 0.0         | 0.3 ± 0.0    |
|                                   |                                                                                                   | 34.5                          | 5 cm              | 5 s           | 0.9 ± 0.1                                                                                 | 0.6 ± 0.0 | 0.7 ± 0.0 | 0.8 ± 0.1         | 0.7 ± 0.0    |
|                                   |                                                                                                   | 69.0                          | 5 cm              | 10 s          | 1.4 ± 0.1                                                                                 | 1.2 ± 0.1 | 1.2 ± 0.0 | 1.3 ± 0.0         | 1.1 ± 0.1    |
| 272 nm Prototype Handheld         | 8 LED strips divided by angled plastic in handheld device<br>272 nm UV-C                          | 31.2                          | 5 cm              | 2 s           | 3.0 ± 0.3                                                                                 | 1.6 ± 0.2 | 1.6 ± 0.1 | 1.6 ± 0.2         | 1.6 ± 0.2    |
|                                   |                                                                                                   | 78.0                          | 5 cm              | 5 s           | 5.2 ± 0.1                                                                                 | 2.8 ± 0.1 | 2.5 ± 0.2 | 3.1 ± 0.2         | 2.0 ± 0.9    |
|                                   |                                                                                                   | 156                           | 5 cm              | 10 s          | 6.2 ± 0.4                                                                                 | 3.8 ± 0.2 | 2.4 ± 0.1 | 4.9 ± 0.2         | 4.7 ± 0.5    |
| 222 nm Excimer Prototype Handheld | 3 UV lights attached to 2.54 cm thick plastic panel in handheld device<br>222 nm UV-C             | 5.9                           | 5 cm              | 2 s           | 0.6 ± 0.1                                                                                 | 0.4 ± 0.2 | 0.1 ± 0.1 | 0.3 ± 0.1         | 0.3 ± 0.1    |
|                                   |                                                                                                   | 14.8                          | 5 cm              | 5 s           | 0.9 ± 0.2                                                                                 | 0.1 ± 0.1 | 0.5 ± 0.1 | 0.5 ± 0.1         | 0.6 ± 0.2    |
|                                   |                                                                                                   | 29.6                          | 5 cm              | 10 s          | 1.1 ± 0.2                                                                                 | 0.9 ± 0.1 | 0.6 ± 0.1 | 0.9 ± 0.1         | 1.1 ± 0.1    |
| Mounted Pulsed-Xenon Prototype    | Pulsed-Xe bulb in small housing ceiling, wall, or tripod-mounted Broad-spectrum UV-B, UV-C        | N/A                           | 0.5 m             | 15 min        | 1.4 ± 0.1                                                                                 | 1.1 ± 0.1 | 1.1 ± 0.1 | 1.5 ± 0.1         | N/A          |
|                                   |                                                                                                   |                               | 0.5 m             | 30 min        | 2.3 ± 0.1                                                                                 | 2.3 ± 0.1 | 1.6 ± 0.1 | 2.9 ± 0.1         | N/A          |
|                                   |                                                                                                   |                               | 0.5 m             | 60 min        | 5.2 ± 0.2                                                                                 | 3.2 ± 0.3 | 2.4 ± 0.2 | 5.2 ± 0.2         | N/A          |
|                                   |                                                                                                   |                               | 1 m               | 15 min        | 0.5 ± 0.0                                                                                 | 0.4 ± 0.1 | 0.4 ± 0.1 | 0.3 ± 0.1         | N/A          |
|                                   |                                                                                                   |                               | 1 m               | 30 min        | 0.8 ± 0.0                                                                                 | 0.7 ± 0.0 | 0.7 ± 0.1 | 0.7 ± 0.0         | N/A          |
|                                   |                                                                                                   |                               | 1 m               | 60 min        | 1.5 ± 0.1                                                                                 | 1.3 ± 0.1 | 1.0 ± 0.0 | 1.3 ± 0.1         | N/A          |
|                                   |                                                                                                   |                               | 2 m               | 15 min        | 0.0 ± 0.1                                                                                 | 0.1 ± 0.1 | 0.2 ± 0.0 | 0.1 ± 0.0         | N/A          |
|                                   |                                                                                                   |                               | 2 m               | 30 min        | 0.1 ± 0.0                                                                                 | 0.0 ± 0.0 | 0.2 ± 0.0 | 0.2 ± 0.1         | N/A          |
| Xenex Lightstrike                 | 1 pulsed-Xe bulb mounted on rolling cart<br>Broad-spectrum UV-B, UV-C<br>MSRP \$125,000           | N/A                           | 178 cm            | 5 min         | 0.8 ± 0.1                                                                                 | 0.4 ± 0.0 | 0.5 ± 0.0 | 0.5 ± 0.0         | N/A          |
|                                   |                                                                                                   | N/A                           | 178 cm            | 20 min        | 1.7 ± 0.0                                                                                 | 1.5 ± 0.1 | 1.3 ± 0.0 | 2.2 ± 0.1         | NA           |
| Light Emitting Module (LEM)       | 20 Hg bulbs mounted in a ring on rolling cart<br>254 nm UV-C<br>MSRP \$95,000                     | 60                            | 263 cm            | 4 min 22 s    | 3.1 ± 0.3                                                                                 | 2.6 ± 0.2 | 1.6 ± 0.1 | 2.5 ± 0.2         | 2.1 ± 0.1    |
|                                   |                                                                                                   | 100                           | 263 cm            | 7 min 2 s     | 4.6 ± 0.5                                                                                 | 2.7 ± 0.2 | 2.2 ± 0.1 | 2.7 ± 0.2         | 3.1 ± 0.1    |
|                                   |                                                                                                   | 140                           | 263 cm            | 9 min 33 s    | 5.3 ± 0.5                                                                                 | 3.4 ± 0.1 | 2.7 ± 0.1 | 4.0 ± 0.2         | 3.9 ± 0.1    |
| Medium Conveyer Prototype         | Chamber lined on 4sides with Hg bulbs, powered conveyer belt to move items through<br>254 nm UV-C | 60                            | 62 cm             | 20 s          | 6.1 ± 0.2                                                                                 | 4.5 ± 0.1 | 2.9 ± 0.3 | 4.8 ± 0.2         | 5.3 ± 0.1    |
|                                   |                                                                                                   | 100                           | 62 cm             | 32 s          | 7.6 ± 0.3                                                                                 | 4.4 ± 0.2 | 2.9 ± 0.2 | 6.3 ± 0.2         | 7.1 ± 0.3    |
|                                   |                                                                                                   | 140                           | 62 cm             | 44 s          | 7.1 ± 0.4                                                                                 | 4.3 ± 0.5 | 2.6 ± 0.1 | 6.3 ± 0.3         | 6.3 ± 0.3    |
|                                   |                                                                                                   | 13.7                          | 62 cm             | 8 s           | 1.6 ± 0.2                                                                                 | 1.4 ± 0.1 | 1.3 ± 0.1 | 1.4 ± 0.1         | N/A          |
|                                   |                                                                                                   | 23.8                          | 62 cm             | 16 s          | 2.7 ± 0.2                                                                                 | 1.9 ± 0.1 | 1.8 ± 0.1 | 2.1 ± 0.1         | N/A          |
|                                   |                                                                                                   | 40.0                          | 62 cm             | 24 s          | 3.5 ± 0.3                                                                                 | 2.8 ± 0.1 | 2.5 ± 0.1 | 2.9 ± 0.1         | N/A          |
|                                   |                                                                                                   | 56.2                          | 62 cm             | 32 s          | 4.7 ± 0.4                                                                                 | 3.2 ± 0.2 | 2.9 ± 0.1 | 3.7 ± 0.1         | N/A          |
| Big Box Prototype                 | Chamber lined on sides and top with Hg bulbs (total 320)<br>254 nm UV-C                           | 377-729                       | 17 cm             | 2 min         | 5.4 ± 0.2                                                                                 | 3.6 ± 0.3 | 3.1 ± 0.2 | 5.7 ± 0.1         | 5.4 ± 0.3    |

963 **Table 2.** Dosage and efficacy of handheld, room and chamber-type devices showing log<sub>10</sub>  
 964 survival data. Handheld and room decontaminating devices were tested by exposing coupons to  
 965 UV at use-case exposure distances and times. The conveyer prototype was tested via positioning  
 966 coupons on the rollers in the center of the conveyor, and the big box prototype tested via  
 967 positioning coupons on top of a double-stacked pallet placed inside the unit. Legend: White =  
 968 Fail <2 log<sub>10</sub>; low decontamination; Yellow = Fail ≥2 log<sub>10</sub>, <3 log<sub>10</sub>; sanitation, Light Blue =  
 969 Pass ≥ 3 log<sub>10</sub>; disinfection, and Dark Blue = Pass ≥ 6 log<sub>10</sub>; approaching virus sterilization.  
 970 Dosage is based on the steady state emission, not peak emission. Due to the broad spectrum  
 971 nature of the pulsed Xe bulb, dosage could not be accurately calculated. N/A – dosage  
 972 measurements had no meaning because of the broad spectrum light source.

| Name                              | Description                                                                                        | Dosage (mJ cm <sup>-2</sup> ) | Exposure Distance | Exposure Time | Log <sub>10</sub> Survival after a >8 log <sub>10</sub> challenge of live Φ6 |           |           |           |                   |              |
|-----------------------------------|----------------------------------------------------------------------------------------------------|-------------------------------|-------------------|---------------|------------------------------------------------------------------------------|-----------|-----------|-----------|-------------------|--------------|
|                                   |                                                                                                    |                               |                   |               | Control                                                                      | SS 304    | NTC       | Cardboard | Keyboard Keys/ABS | Polyurethane |
| GermAway UV 18W Handheld          | 2 12.7 cm U-shape Hg bulbs in handheld device<br>254 nm UV-C<br>MSRP \$100                         | 101.2                         | 5 cm              | 10 s          | 8.4 +/- 0.1                                                                  | 5.9 ± 0.5 | 6.4 ± 0.1 | 6.5 ± 0.1 | 5.5 ± 1.1         | 6.4 ± 0.1    |
|                                   |                                                                                                    | 202.4                         | 5 cm              | 20 s          | 8.2 +/- 0.0                                                                  | 3.9 ± 0.4 | 5.0 ± 0.4 | 6.1 ± 0.3 | 3.7 ± 0.3         | 5.1 ± 0.2    |
| GermAway UV 35W Handheld          | 2 22.5 cm twin tube Hg bulbs in handheld device<br>254 nm UV-C<br>MSRP \$450                       | 13.8                          | 5 cm              | 2 s           | 8.2 +/- 0.1                                                                  | 7.8 ± 0.2 | 7.9 ± 0.1 | 7.8 ± 0.1 | 7.8 ± 0.2         | 7.8 ± 0.1    |
|                                   |                                                                                                    | 34.5                          | 5 cm              | 5 s           |                                                                              | 7.2 ± 0.2 | 7.5 ± 0.1 | 7.3 ± 0.1 | 7.3 ± 0.3         | 7.4 ± 0.1    |
|                                   |                                                                                                    | 69.0                          | 5 cm              | 10 s          |                                                                              | 6.6 ± 0.3 | 6.9 ± 0.2 | 6.9 ± 0.1 | 6.8 ± 0.2         | 7.0 ± 0.2    |
| 272 nm Prototype Handheld         | 8 LED strips divided by angled plastic in handheld device<br>272 nm UV-C                           | 31.2                          | 5 cm              | 2 s           | 8.5 +/- 0.2                                                                  | 5.5 ± 0.6 | 7.0 ± 0.3 | 6.9 ± 0.2 | 6.9 ± 0.3         | 6.9 ± 0.4    |
|                                   |                                                                                                    | 78.0                          | 5 cm              | 5 s           |                                                                              | 3.3 ± 0.0 | 5.7 ± 0.1 | 6.0 ± 0.4 | 5.4 ± 0.3         | 6.5 ± 1.9    |
|                                   |                                                                                                    | 156                           | 5 cm              | 10 s          |                                                                              | 2.3 ± 0.7 | 4.7 ± 0.3 | 6.1 ± 0.1 | 3.6 ± 0.5         | 3.8 ± 0.9    |
| 222 nm Excimer Prototype Handheld | 3 lamp modules attached to 2.54 cm thick plastic panel, in handheld device<br>222 nm UV-C          | 5.9                           | 5 cm              | 2 s           | 8.3 +/- 0.2                                                                  | 7.7 ± 0.2 | 7.9 ± 0.3 | 8.2 ± 0.1 | 8.0 ± 0.1         | 7.9 ± 0.0    |
|                                   |                                                                                                    | 14.8                          | 5 cm              | 5 s           |                                                                              | 7.4 ± 0.3 | 8.2 ± 0.1 | 7.8 ± 0.1 | 7.8 ± 0.2         | 7.6 ± 0.3    |
|                                   |                                                                                                    | 29.6                          | 5 cm              | 10 s          |                                                                              | 7.1 ± 0.4 | 7.1 ± 0.4 | 7.6 ± 0.1 | 7.4 ± 0.2         | 7.1 ± 0.1    |
| Mounted Pulsed-Xenon Prototype    | Pulsed-Xe bulb in small housing ceiling, wall, or tripod-mounted Broad-spectrum UV-B, UV-C         | N/A                           | 0.5 m             | 15 min        | 8.2 +/- 0.1                                                                  | 6.8 ± 0.2 | 7.0 ± 0.2 | 7.1 ± 0.2 | 6.7 ± 0.1         | N/A          |
|                                   |                                                                                                    |                               | 0.5 m             | 30 min        |                                                                              | 5.9 ± 0.3 | 5.8 ± 0.3 | 6.6 ± 0.1 | 5.3 ± 0.2         | N/A          |
|                                   |                                                                                                    |                               | 0.5 m             | 60 min        |                                                                              | 2.9 ± 0.4 | 5.0 ± 0.8 | 5.7 ± 0.5 | 3.0 ± 0.6         | N/A          |
|                                   |                                                                                                    |                               | 1 m               | 15 min        |                                                                              | 7.7 ± 0.1 | 7.7 ± 0.2 | 7.7 ± 0.1 | 7.8 ± 0.1         | N/A          |
|                                   |                                                                                                    |                               | 1 m               | 30 min        |                                                                              | 7.4 ± 0.1 | 7.5 ± 0.0 | 7.4 ± 0.1 | 7.4 ± 0.1         | N/A          |
|                                   |                                                                                                    |                               | 1 m               | 60 min        |                                                                              | 6.7 ± 0.2 | 6.8 ± 0.2 | 7.2 ± 0.1 | 6.8 ± 0.2         | N/A          |
|                                   |                                                                                                    |                               | 2 m               | 15 min        |                                                                              | 8.2 ± 0.1 | 8.1 ± 0.1 | 8.0 ± 0.1 | 8.1 ± 0.0         | N/A          |
|                                   |                                                                                                    |                               | 2 m               | 30 min        |                                                                              | 8.1 ± 0.1 | 8.1 ± 0.1 | 8.0 ± 0.1 | 8.0 ± 0.1         | N/A          |
| Xenex Lightstrike                 | 1 pulsed-Xe bulb mounted on rolling cart<br>Broad-spectrum UV-B, UV-C<br>MSRP \$125,000            | N/A                           | 178 cm            | 5 min         | 8.4 +/- 0.0                                                                  | 7.6 ± 0.2 | 8.0 ± 0.1 | 7.9 ± 0.1 | 7.8 ± 0.1         | N/A          |
|                                   |                                                                                                    | N/A                           | 178 cm            | 20 min        |                                                                              | 6.7 ± 0   | 6.9 ± 0.3 | 7.1 ± 0.0 | 6.2 ± 0.1         | N/A          |
| Light Emitting Module (LEM)       | 20 Hg bulbs mounted in a ring on rolling cart<br>254 nm UV-C<br>MSRP \$95,000                      | 60                            | 263 cm            | 4 min 22 s    | 8.4 +/- 0.2                                                                  | 5.3 ± 0.6 | 5.8 ± 0.5 | 6.8 ± 0.2 | 5.9 ± 0.5         | 6.3 ± 0.1    |
|                                   |                                                                                                    | 100                           | 263 cm            | 7 min 2 s     |                                                                              | 3.8 ± 1.1 | 5.7 ± 0.5 | 6.2 ± 0.2 | 5.7 ± 0.4         | 5.3 ± 0.1    |
|                                   |                                                                                                    | 140                           | 263 cm            | 9 min 33 s    |                                                                              | 3.1 ± 1.1 | 5.0 ± 0.3 | 5.8 ± 0.2 | 4.4 ± 0.3         | 4.6 ± 0.2    |
| Medium Conveyer Prototype         | Chamber lined on 4 sides with Hg bulbs, powered conveyer belt to move items through<br>254 nm UV-C | 60                            | 62 cm             | 20 s          | 8.2 +/- 0.1                                                                  | 2.1 ± 0.4 | 3.7 ± 0   | 5.3 ± 0.6 | 3.4 ± 0.4         | 2.9 ± 0.1    |
|                                   |                                                                                                    | 100                           | 62 cm             | 32 s          |                                                                              | 0.6 ± 0.6 | 3.8 ± 0.5 | 5.3 ± 0.4 | 2.0 ± 0.4         | 1.1 ± 0.7    |
|                                   |                                                                                                    | 140                           | 62 cm             | 44 s          |                                                                              | 1.1 ± 0.8 | 3.9 ± 1.1 | 5.6 ± 0.1 | 1.9 ± 0.6         | 0.9 ± 0.5    |
|                                   |                                                                                                    | 13.7                          | 62 cm             | 8 s           | 8.4 +/- 0.2                                                                  | 6.8 ± 0.4 | 7.0 ± 0.1 | 7.1 ± 0.1 | 7.0 ± 0.1         | N/A          |
|                                   |                                                                                                    | 23.8                          | 62 cm             | 16 s          |                                                                              | 5.6 ± 0.4 | 6.5 ± 0.1 | 6.5 ± 0.2 | 6.3 ± 0.1         | N/A          |
|                                   |                                                                                                    | 40.0                          | 62 cm             | 24 s          |                                                                              | 4.8 ± 0.6 | 5.5 ± 0.2 | 5.8 ± 0.3 | 5.4 ± 0.2         | N/A          |
|                                   |                                                                                                    | 56.2                          | 62 cm             | 32 s          |                                                                              | 3.7 ± 1.0 | 5.1 ± 0.4 | 5.5 ± 0.2 | 4.7 ± 0.1         | N/A          |
| Big Box Prototype                 | Chamber lined on sides and top with Hg bulbs (total 320)<br>254 nm UV-C                            | 377-729                       | 17 cm             | 2 min         | 8.4 +/- 0.1                                                                  | 3.0 ± 0.4 | 4.8 ± 0.6 | 5.3 ± 0.5 | 2.5 ± 0.3         | 3.0 ± 0.6    |
|                                   |                                                                                                    |                               |                   |               | 8.2 +/- 0.1 (ABS plastic only)                                               |           |           |           |                   |              |

973 **Table 3.** Dosage and efficacy of room-air-irradiating prototypes showing log<sub>10</sub> reduction data.  
 974 Prototypes were tested at representative exposure distances but the exposure times were much  
 975 longer than expected for application in order to provide modeling data. Bio-efficacy testing on  
 976 the original prototypes A, B, and C evaluated the performance of the UV light source only.  
 977 Testing on the modified prototypes A and B evaluated the internal improvements to the device.  
 978 Thus bio-efficacy data presented would be significantly less if realistic, shorter times were tested.  
 979 Legend: White = Fail <2 log<sub>10</sub>; low decontamination; Yellow = Fail ≥2 log<sub>10</sub>, <3 log<sub>10</sub>;  
 980 sanitation, Light Blue = Pass ≥ 3 log<sub>10</sub>; disinfection, and Dark Blue = Pass ≥ 6 log<sub>10</sub>; approaching  
 981 virus sterilization. Dosage is based on the average power from the bulb area, not the peaks. .  
 982 Efficacy values indicate log<sub>10</sub> reduction after a ≥8 log<sub>10</sub>- challenge of live, dried enveloped virus.

| Name                                  | Description                                                                                   | Dosage (mJ cm <sup>-2</sup> ) | Exposure Distance (cm) | Exposure Time (s) | Efficacy (Log <sub>10</sub> Reduction after a >8 log <sub>10</sub> challenge of live Φ6) |              |
|---------------------------------------|-----------------------------------------------------------------------------------------------|-------------------------------|------------------------|-------------------|------------------------------------------------------------------------------------------|--------------|
|                                       |                                                                                               |                               |                        |                   | SS 304                                                                                   | Quartz Glass |
| Ceiling-mounted prototype A: Original | 2 Hg bulbs within enclosed chamber; fans circulate air through unit<br><br>254 nm UV-C        | 18.6                          | 5                      | 5                 | 0.9 ± 0.1                                                                                | NA           |
|                                       |                                                                                               | 37.2                          |                        | 10                | 1.3 ± 0.1                                                                                | NA           |
|                                       |                                                                                               | 55.8                          |                        | 15                | 1.7 ± 0.1                                                                                | NA           |
|                                       |                                                                                               | 12.9                          | 10                     | 5                 | 0.6 ± 0.1                                                                                | NA           |
|                                       |                                                                                               | 25.7                          |                        | 10                | 1.0 ± 0.1                                                                                | NA           |
|                                       |                                                                                               | 38.6                          |                        | 15                | 1.3 ± 0.1                                                                                | NA           |
|                                       |                                                                                               | 10.6                          | 15                     | 5                 | 0.5 ± 0.1                                                                                | NA           |
|                                       |                                                                                               | 21.1                          |                        | 10                | 0.8 ± 0.1                                                                                | NA           |
|                                       |                                                                                               | 31.7                          |                        | 15                | 1.1 ± 0.1                                                                                | NA           |
| Wall-mounted device A: Modified       | KrCl/Excimer lamp within enclosed chamber; fans circulate air through unit<br><br>222 nm UV-C | 15.2                          | 4                      | 5                 | NA                                                                                       | 5.5 ± 0.6    |
|                                       |                                                                                               | 30.5                          |                        | 10                | NA                                                                                       | 6.4 ± 0.3    |
|                                       |                                                                                               | 45.8                          |                        | 15                | NA                                                                                       | 6.6 ± 0.7    |
|                                       |                                                                                               | 6.9                           | 10                     | 5                 | NA                                                                                       | 2.2 ± 0.2    |
|                                       |                                                                                               | 13.7                          |                        | 10                | NA                                                                                       | 4.6 ± 0.7    |
|                                       |                                                                                               | 20.6                          |                        | 15                | NA                                                                                       | 6.7 ± 0.2    |
|                                       |                                                                                               | 3.4                           | 20                     | 5                 | NA                                                                                       | 1.3 ± 0.1    |
|                                       |                                                                                               | 6.8                           |                        | 10                | NA                                                                                       | 2.4 ± 0.3    |
|                                       |                                                                                               | 10.2                          |                        | 15                | NA                                                                                       | 4.0 ± 0.6    |
| Wall-mounted prototype B: Original    | Hg bulb within open sconce; fans circulate air through unit<br><br>254 nm UV-C                | 29.9                          | 5                      | 5                 | 1.6 ± 0.1                                                                                | NA           |
|                                       |                                                                                               | 59.8                          |                        | 10                | 2.5 ± 0.1                                                                                | NA           |
|                                       |                                                                                               | 89.7                          |                        | 15                | 3.4 ± 0.1                                                                                | NA           |
|                                       |                                                                                               | 15.8                          | 10                     | 5                 | 1.1 ± 0.1                                                                                | NA           |
|                                       |                                                                                               | 31.6                          |                        | 10                | 1.7 ± 0.1                                                                                | NA           |
|                                       |                                                                                               | 47.4                          |                        | 15                | 2.3 ± 0.1                                                                                | NA           |
|                                       |                                                                                               | 9.9                           | 15                     | 5                 | 0.8 ± 0.1                                                                                | NA           |
|                                       |                                                                                               | 19.7                          |                        | 10                | 1.3 ± 0.2                                                                                | NA           |
|                                       |                                                                                               | 29.6                          |                        | 15                | 1.5 ± 0.1                                                                                | NA           |
| Wall-mounted prototype B:: Modified   | KrCl/Excimer lamp within open sconce; fans circulate air through unit<br><br>222 nm UV-C      | 15.6                          | 5                      | 5                 | 0.5 ± 0.1                                                                                | NA           |
|                                       |                                                                                               | 31.2                          |                        | 10                | 0.9 ± 0.2                                                                                | NA           |
|                                       |                                                                                               | 46.8                          |                        | 15                | 1.2 ± 0.3                                                                                | NA           |
|                                       |                                                                                               | 7.5                           | 15                     | 5                 | 0.6 ± 0.2                                                                                | NA           |
|                                       |                                                                                               | 15.0                          |                        | 10                | 0.5 ± 0.3                                                                                | NA           |
|                                       |                                                                                               | 22.5                          |                        | 15                | 0.9 ± 0.1                                                                                | NA           |
|                                       |                                                                                               | 2.8                           | 30.5                   | 5                 | 0.1 ± 0.1                                                                                | NA           |
|                                       |                                                                                               | 5.6                           |                        | 10                | 0.2 ± 0.1                                                                                | NA           |
|                                       |                                                                                               | 8.4                           |                        | 15                | 0.2 ± 0.2                                                                                | NA           |
|                                       |                                                                                               | 0.2                           | 61                     | 5                 | 0.0 ± 0.2                                                                                | NA           |
|                                       |                                                                                               | 0.3                           |                        | 10                | 0.0 ± 0.2                                                                                | NA           |
|                                       |                                                                                               | 0.5                           |                        | 15                | 0.1 ± 0.1                                                                                | NA           |
|                                       |                                                                                               | 0.1                           | 71                     | 5                 | 0.0 ± 0.1                                                                                | NA           |
|                                       |                                                                                               | 0.2                           |                        | 10                | 0.0 ± 0.1                                                                                | NA           |
|                                       |                                                                                               | 0.3                           |                        | 15                | 0.0 ± 0.1                                                                                | NA           |
| Wall-mounted prototype C              | Hg bulb within open sconce; fans circulate air through unit<br><br>254 nm UV-C                | 16.6                          | 5                      | 5                 | 0.9 ± 0.2                                                                                | NA           |
|                                       |                                                                                               | 33.2                          |                        | 10                | 1.6 ± 0.0                                                                                | NA           |
|                                       |                                                                                               | 49.8                          |                        | 15                | 2.2 ± 0.2                                                                                | NA           |
|                                       |                                                                                               | 9.1                           | 10                     | 5                 | 0.7 ± 0.1                                                                                | NA           |
|                                       |                                                                                               | 18.2                          |                        | 10                | 0.9 ± 0.1                                                                                | NA           |
|                                       |                                                                                               | 27.3                          |                        | 15                | 1.3 ± 0.1                                                                                | NA           |
|                                       |                                                                                               | 6.4                           | 15                     | 5                 | 0.5 ± 0.1                                                                                | NA           |
|                                       |                                                                                               | 12.8                          |                        | 10                | 0.8 ± 0.0                                                                                | NA           |
|                                       |                                                                                               | 19.2                          |                        | 15                | 1.2 ± 0.1                                                                                | NA           |

984 **Table 4.** Dosage and efficacy of room-air-irradiating prototypes showing log<sub>10</sub> survival data.  
 985 Prototypes were tested at representative exposure distances but the exposure times were much  
 986 longer than expected for application in order to provide modeling data. Bio-efficacy testing on  
 987 the original prototypes A, B, and C evaluated the performance of the UV light source only.  
 988 Testing on the modified prototypes A and B evaluated the internal improvements to the device.  
 989 Thus bio-efficacy data presented would be significantly less if realistic, shorter times were  
 990 tested. Legend: White = Fail <2 log<sub>10</sub>; low decontamination; Yellow = Fail ≥2 log<sub>10</sub>, <3 log<sub>10</sub>;  
 991 sanitation, Light Blue = Pass ≥ 3 log<sub>10</sub>; disinfection, and Dark Blue = Pass ≥ 6 log<sub>10</sub>; approaching  
 992 virus sterilization. Dosage is based on the average power from the bulb area, not the peaks.  
 993 Efficacy values indicate log<sub>10</sub> reduction after a ≥8 log<sub>10</sub>- challenge of live, dried enveloped virus.

| Name                                  | Description                                                                                   | Dosage (mJ cm <sup>-2</sup> ) | Exposure Distance (cm)                                                         | Exposure Time (s) | Log <sub>10</sub> Survival after a >8 log <sub>10</sub> challenge of live Φ6 |           |              |             |           |    |
|---------------------------------------|-----------------------------------------------------------------------------------------------|-------------------------------|--------------------------------------------------------------------------------|-------------------|------------------------------------------------------------------------------|-----------|--------------|-------------|-----------|----|
|                                       |                                                                                               |                               |                                                                                |                   | Control                                                                      | SS 304    | Quartz Glass |             |           |    |
| Ceiling-mounted Prototype A: Original | 2 Hg bulbs within enclosed chamber; fans circulate air through unit<br><br>254 nm UV-C        | 18.6                          | 5                                                                              | 5                 | 8.2 +/- 0.0                                                                  | 7.3 ± 0.3 | NA           |             |           |    |
|                                       |                                                                                               | 37.2                          |                                                                                | 10                |                                                                              | 6.9 ± 0.1 | NA           |             |           |    |
|                                       |                                                                                               | 55.8                          |                                                                                | 15                |                                                                              | 6.5 ± 0.2 | NA           |             |           |    |
|                                       |                                                                                               | 12.9                          | 10                                                                             | 5                 |                                                                              | 7.6 ± 0.2 | NA           |             |           |    |
|                                       |                                                                                               | 25.7                          |                                                                                | 10                |                                                                              | 7.2 ± 0.3 | NA           |             |           |    |
|                                       |                                                                                               | 38.6                          |                                                                                | 15                |                                                                              | 7.0 ± 0.1 | NA           |             |           |    |
|                                       |                                                                                               | 10.6                          | 15                                                                             | 5                 |                                                                              | 7.8 ± 0.1 | NA           |             |           |    |
|                                       |                                                                                               | 21.1                          |                                                                                | 10                |                                                                              | 7.4 ± 0.3 | NA           |             |           |    |
|                                       |                                                                                               | 31.7                          |                                                                                | 15                |                                                                              | 7.1 ± 0.2 | NA           |             |           |    |
| Wall-mounted Prototype A: Modified    | KrCl/Excimer lamp within enclosed chamber; fans circulate air through unit<br><br>222 nm UV-C | 15.2                          | 4                                                                              | 5                 | 8.2 +/- 0.1                                                                  | NA        | 2.7 ± 1.4    |             |           |    |
|                                       |                                                                                               | 30.5                          |                                                                                | 10                |                                                                              | NA        | 1.8 ± 0.7    |             |           |    |
|                                       |                                                                                               | 45.8                          |                                                                                | 15                |                                                                              | NA        | 1.6 ± 1.6    |             |           |    |
|                                       |                                                                                               | 6.9                           | 10                                                                             | 5                 |                                                                              | NA        | 6.0 ± 0.5    |             |           |    |
|                                       |                                                                                               | 13.7                          |                                                                                | 10                |                                                                              | NA        | 3.5 ± 1.5    |             |           |    |
|                                       |                                                                                               | 20.6                          |                                                                                | 15                |                                                                              | NA        | 1.4 ± 0.4    |             |           |    |
|                                       |                                                                                               | 3.4                           | 20                                                                             | 5                 |                                                                              | NA        | 6.8 ± 0.3    |             |           |    |
|                                       |                                                                                               | 6.8                           |                                                                                | 10                |                                                                              | NA        | 5.7 ± 0.7    |             |           |    |
|                                       |                                                                                               | 10.2                          |                                                                                | 15                |                                                                              | NA        | 4.1 ± 1.3    |             |           |    |
| Wall-mounted Prototype B: Original    | Hg bulb within open sconce; fans circulate air through unit<br><br>254 nm UV-C                | 29.9                          | 5                                                                              | 5                 | 8.2 +/- 0.0                                                                  | 6.7 ± 0.1 | NA           |             |           |    |
|                                       |                                                                                               | 59.8                          |                                                                                | 10                |                                                                              | 5.7 ± 0.2 | NA           |             |           |    |
|                                       |                                                                                               | 89.7                          |                                                                                | 15                |                                                                              | 4.8 ± 0.3 | NA           |             |           |    |
|                                       |                                                                                               | 15.8                          | 10                                                                             | 5                 |                                                                              | 7.1 ± 0.2 | NA           |             |           |    |
|                                       |                                                                                               | 31.6                          |                                                                                | 10                |                                                                              | 6.5 ± 0.2 | NA           |             |           |    |
|                                       |                                                                                               | 47.4                          |                                                                                | 15                |                                                                              | 5.9 ± 0.3 | NA           |             |           |    |
|                                       |                                                                                               | 9.9                           | 15                                                                             | 5                 |                                                                              | 7.5 ± 0.2 | NA           |             |           |    |
|                                       |                                                                                               | 19.7                          |                                                                                | 10                |                                                                              | 6.9 ± 0.4 | NA           |             |           |    |
|                                       |                                                                                               | 29.6                          |                                                                                | 15                |                                                                              | 6.7 ± 0.2 | NA           |             |           |    |
| Wall-mounted Prototype B: Modified    | KrCl/Excimer lamp within open sconce; fans circulate air through unit<br><br>222 nm UV-C      | 15.6                          | 5                                                                              | 5                 | 8.1 +/- 0.3                                                                  | 7.6 ± 0.1 | NA           |             |           |    |
|                                       |                                                                                               | 31.2                          |                                                                                | 10                |                                                                              | 7.2 ± 0.4 | NA           |             |           |    |
|                                       |                                                                                               | 46.8                          |                                                                                | 15                |                                                                              | 6.9 ± 0.6 | NA           |             |           |    |
|                                       |                                                                                               | 7.5                           | 15                                                                             | 5                 |                                                                              | 7.6 ± 0.2 | NA           |             |           |    |
|                                       |                                                                                               | 15.0                          |                                                                                | 10                |                                                                              | 7.6 ± 0.6 | NA           |             |           |    |
|                                       |                                                                                               | 22.5                          |                                                                                | 15                |                                                                              | 7.2 ± 0.1 | NA           |             |           |    |
|                                       |                                                                                               | 2.8                           | 30.5                                                                           | 5                 |                                                                              | 8.1 ± 0.1 | NA           |             |           |    |
|                                       |                                                                                               | 5.6                           |                                                                                | 10                |                                                                              | 7.9 ± 0.2 | NA           |             |           |    |
|                                       |                                                                                               | 8.4                           |                                                                                | 15                |                                                                              | 7.9 ± 0.2 | NA           |             |           |    |
|                                       |                                                                                               | 0.2                           | 61                                                                             | 5                 |                                                                              | 8.1 ± 0.2 | NA           |             |           |    |
|                                       |                                                                                               | 0.3                           |                                                                                | 10                |                                                                              | 8.1 ± 0.2 | NA           |             |           |    |
|                                       |                                                                                               | 0.5                           |                                                                                | 15                |                                                                              | 8.0 ± 0.1 | NA           |             |           |    |
|                                       |                                                                                               | 0.1                           | 71                                                                             | 5                 |                                                                              | 8.1 ± 0.1 | NA           |             |           |    |
|                                       |                                                                                               | 0.2                           |                                                                                | 10                |                                                                              | 8.1 ± 0.1 | NA           |             |           |    |
|                                       |                                                                                               | 0.3                           |                                                                                | 15                |                                                                              | 8.1 ± 0.2 | NA           |             |           |    |
|                                       |                                                                                               | Wall-mounted Prototype C      | Hg bulb within open sconce; fans circulate air through unit<br><br>254 nm UV-C | 16.6              |                                                                              | 5         | 5            | 8.2 +/- 0.0 | 7.4 ± 0.3 | NA |
|                                       |                                                                                               |                               |                                                                                | 33.2              |                                                                              |           | 10           |             | 6.7 ± 0.1 | NA |
|                                       |                                                                                               |                               |                                                                                | 49.8              |                                                                              |           | 15           |             | 6.1 ± 0.3 | NA |
| 9.1                                   | 10                                                                                            |                               |                                                                                | 5                 | 7.5 ± 0.2                                                                    | NA        |              |             |           |    |
| 18.2                                  |                                                                                               |                               |                                                                                | 10                | 7.3 ± 0.2                                                                    | NA        |              |             |           |    |
| 27.3                                  |                                                                                               |                               |                                                                                | 15                | 6.9 ± 0.2                                                                    | NA        |              |             |           |    |
| 6.4                                   | 15                                                                                            |                               |                                                                                | 5                 | 7.7 ± 0.1                                                                    | NA        |              |             |           |    |
| 12.8                                  |                                                                                               |                               |                                                                                | 10                | 7.4 ± 0.1                                                                    | NA        |              |             |           |    |
| 19.2                                  |                                                                                               |                               |                                                                                | 15                | 7.1 ± 0.1                                                                    | NA        |              |             |           |    |
